1           **Genomic investigation of the strawberry pathogen *Phytophthora***  
2           ***fragariae* indicates pathogenicity is associated with transcriptional**  
3           **variation in three key races**

4  
5   **Thomas M. Adams<sup>1,2</sup>□, Andrew D. Armitage<sup>1</sup>, Maria K. Sobczyk<sup>1</sup>†, Helen J. Bates<sup>1</sup>, Javier F.**  
6   **Tabima<sup>3</sup>, Brent A. Kronmiller<sup>4</sup>, Brett M. Tyler<sup>3,4</sup>, Niklaus J. Grünwald<sup>5</sup>, Jim M. Dunwell<sup>2</sup>,**  
7   **Charlotte F. Nellist<sup>1\*</sup> and Richard J. Harrison<sup>1,6</sup>**

8  
9   <sup>1</sup>Department of Genetics, Genomics and Breeding, NIAB EMR, New Road, East Malling, Kent,  
10 ME19 6BJ, UK.

11   <sup>2</sup>School of Agriculture, Policy and Development, University of Reading, Reading, Berkshire, RG6  
12 6AH, UK.

13   <sup>3</sup>Department of Botany and Plant Pathology, Center for Genome Biology and Biocomputing, Oregon  
14 State University, Corvallis, OR, USA.

15   <sup>4</sup>Center for Genome Biology and Biocomputing, Oregon State University, Corvallis, OR, 97331,  
16 USA.

17   <sup>5</sup>Horticultural Crops Research Unit, Agricultural Research Service, United States Department of  
18 Agriculture, Corvallis, OR, USA.

19   <sup>6</sup>NIAB Cambridge Crop Research, NIAB, Huntingdon Road, Cambridge, CB3 0LE, UK.

20  
21   □ Current address: Department of Crop Genetics, John Innes Centre, Norwich Research Park,  
22 Norwich, NR4 7UH, UK.

23   † Current address: University of Bristol, Oakfield House, Oakfield Grove, Clifton, BS8 2BN, UK.

24  
25   **\*Correspondence:**

26   Charlotte F. Nellist

27   charlotte.nellist@emr.ac.uk

## 28 **ABSTRACT**

29 The oomycete *Phytophthora fragariae* is a highly destructive pathogen of cultivated strawberry  
30 (*Fragaria* × *ananassa*), causing the root rotting disease, ‘red core’. The host-pathogen interaction has  
31 a well described gene-for-gene resistance relationship, but to date neither candidate avirulence nor  
32 resistance genes have been identified. We sequenced a set of American, Canadian and UK isolates of  
33 known race type, along with three representatives of the closely related pathogen of the raspberry  
34 (*Rubus idaeus*), *Phytophthora rubi*, and found a clear population structure, with a high degree of  
35 nucleotide divergence seen between some race types and abundant private variation associated with  
36 race types 4 and 5. In contrast, between isolates defined as UK races 1, 2 & 3 (UK1-2-3) there was no  
37 evidence of gene loss or gain; or the presence of insertions/deletions (INDELs) or Single Nucleotide  
38 Polymorphisms (SNPs) within or in proximity to putative pathogenicity genes could be found  
39 associated with race variation. Transcriptomic analysis of representative UK1-2-3 isolates revealed  
40 abundant expression variation in key effector family genes associated with pathogen race; however,  
41 further long read sequencing did not reveal any long range polymorphisms to be associated with  
42 avirulence to race UK2 or UK3 resistance, suggesting either control in *trans* or other stable forms of  
43 epigenetic modification modulating gene expression. This work reveals the combined power of  
44 population resequencing to uncover race structure in pathosystems and *in planta* transcriptomic  
45 analysis to identify candidate avirulence genes. This work has implications for the identification of  
46 putative avirulence genes in the absence of associated expression data and points towards the need for  
47 detailed molecular characterisation of mechanisms of effector regulation and silencing in oomycete  
48 plant pathogens.

49

## 50 **INTRODUCTION**

51 *Phytophthora fragariae*, the causal agent of red core or red stele root rot, is a highly destructive  
52 pathogen of cultivated strawberry (*Fragaria* × *ananassa*), resulting in whole plant collapse. The  
53 majority of commercial strawberries grown in the UK are grown on table tops using soilless substrate,  
54 under polytunnels or in glasshouses (Robinson Boyer et al., 2016). *Phytophthora* spp. are a particular  
55 problem in these systems due to the ease of spread through the irrigation system via the motile  
56 zoospores. Since the first report in Scotland in 1920, this disease has spread to the majority of  
57 strawberry growing regions, except China and the Southern Mediterranean regions of Europe (van de  
58 Weg, 1997b; EFSA Panel on Plant Health (PLH), 2014). Currently, it is treated as a quarantine pest  
59 by the European and Mediterranean Plant Protection Organization (EPPO), where it is listed as an A2

60 pest (van de Weg, 1997b; EPPO, 2018). The classification of this pathogen has proven controversial,  
61 as initially the organism was identified as a single species (Hickman, 1941), but when a *Phytophthora*  
62 disease of raspberry (*Rubus idaeus*) was discovered, it was reclassified as *P. fragariae* var. *fragariae*  
63 (Wilcox et al., 1993). More recently, the pathogens have been separated into distinct species, *P.*  
64 *fragariae* and *Phytophthora rubi*, affecting strawberry and raspberry respectively. This was supported  
65 by sequence analysis of key loci (Man in 't Veld, 2007), as well as whole genome analyses (Tabima  
66 et al., 2018).

67 It has previously been proposed that the ability of different isolates of *P. fragariae* to cause  
68 disease on a variety of *F. × ananassa* cultivars can be explained by a gene-for-gene model (van de  
69 Weg, 1997a). The model is currently thought to consist of at least eleven resistance genes in *F. ×*  
70 *ananassa* with eleven corresponding avirulence factors in *P. fragariae* (W. E. van de Weg,  
71 Wageningen University and Research, The Netherlands, personal communication). The development  
72 of race schemes is country dependent and ones exist for the UK, USA and Canada.

73 All publicly available genome assemblies of *P. fragariae* have to date solely utilised Illumina  
74 short read sequencing technologies, resulting in assemblies of 73.68 Mb and 76 Mb, in 1,616 and  
75 8,511 scaffolds respectively (Gao et al., 2015; Tabima et al., 2017). Recently, long read sequencing  
76 technology has been shown to provide assemblies of improved contiguity for *Phytophthora*  
77 pathogens, specifically the generation of the haplotype-phased assembly of *Phytophthora ramorum*  
78 (60.5 Mb in 302 primary contigs) using PacBio sequencing (Malar et al., 2019) and the assembly of  
79 *Phytophthora capsici* (95.2 Mb in 424 scaffolds) using Oxford Nanopore Technology (Cui et al.,  
80 2019).

81 Pathogenomic investigations in *Phytophthora* species of pathosystems with similar gene-for-  
82 gene models of resistance have shown a variety of mechanisms through which variation in virulence  
83 can be controlled. For instance, in *Phytophthora sojae*, the *Avr1d* gene was identified as an RxLR  
84 effector recognised by the *Rps1d* resistance gene in soybean (Yin et al., 2013). Studies of the RxLR  
85 effector *PiAvr4* from *Phytophthora infestans* showed that it was always present in isolates avirulent  
86 on potato plants containing the resistance gene *R4*, whereas virulent isolates possessed a frameshift  
87 mutation producing a truncated protein (van Poppel et al., 2008). In comparison, *Avr3c* in *P. sojae*  
88 was identified in both virulent and avirulent isolates on soybean plants containing *Rps3c*, but in  
89 virulent isolates the gene displayed several polymorphisms resulting in a change to the amino acid  
90 sequence leading to a failure of recognition by the plant (Dong et al., 2009). Recently, investigations  
91 of the EC-1 clonal lineage of *P. infestans* revealed a variation of the ability of isolates to cause disease

92 on potato plants possessing the *Rpi-vnt1.1* gene. It was shown, in the absence of genetic mutations,  
93 that differences in the expression level of *Avrvnt1* were detected and these correlated with virulence  
94 (Pais et al., 2018).

95 In this study, we assembled and annotated a population of isolates of *P. fragariae* and the  
96 related pathogen of raspberry, *P. rubi*. We identified a subpopulation of *P. fragariae* isolates  
97 representing three distinct pathogenicity races (UK1-2-3). This subpopulation was found to be  
98 remarkably similar in gene complement, as well as showing little divergence at the nucleotide  
99 sequence level. To further investigate the cause of the observed variation in pathogenicity phenotypes,  
100 transcriptomic datasets were generated for representative isolates of each pathogenicity race in this  
101 subpopulation. This revealed expression level polymorphisms between the isolates, allowing for the  
102 generation of candidate lists for *PfAvr1*, *PfAvr2* and *PfAvr3*. A strong candidate for *PfAvr2*,  
103 PF003\_g27513 was identified as expressed in the BC-16 and A4 (UK2) isolates, yet not expressed in  
104 the BC-1 (UK1) and NOV-9 (UK3) isolates. A candidate for *PfAvr3* was also identified,  
105 PF009\_g26276; it is expressed in NOV-9 (UK3), yet not expressed in BC-1 (UK1), A4 (UK2) and  
106 BC-16 (UK2) isolates. Additional sequencing did not reveal long-range polymorphisms influencing  
107 the expression of these candidate genes; we therefore suggest control may be in *trans* or due to  
108 epigenetic factors.

109

## 110 **MATERIALS AND METHODS**

### 111 **Isolate selection and sources**

112 A selection of ten isolates of *P. fragariae* were sourced from the Atlantic Food and Horticulture  
113 Research Centre (AFHRC), Nova Scotia, Canada. An additional isolate of *P. fragariae*, SCRP245,  
114 alongside three *P. rubi* isolates, were sourced from the James Hutton Institute (JHI), Dundee, Scotland  
115 (detailed in **Table 1**).

### 116 **Culturing of isolates**

117 All work with *P. fragariae* and *P. rubi* was conducted in a Tri-MAT Class-II microbiological safety  
118 cabinet. Isolates were routinely subcultured on kidney bean agar (KBA) produced as previously  
119 described (Maas, 1972). Isolates were grown by transferring two pieces of between 1 and 4 mm<sup>2</sup> onto  
120 fresh KBA plates, subsequently sealed with Parafilm<sup>®</sup>. Plates were then grown at 20°C in the dark in  
121 a Panasonic MIR-254 cooled incubator for between seven and fourteen days.

122 Mycelia were also grown in liquid pea broth, produced as previously described (Campbell et  
123 al., 1989) with the addition of 10 g/L sucrose. These plates were inoculated with five pieces (1 - 4  
124 mm<sup>2</sup>) of mycelium and media, subsequently sealed with Parafilm<sup>®</sup>. These were grown at 20 °C for  
125 four to five days in constant darkness.

## 126 **Pathogenicity testing of isolates**

127 Mother stock plants of *F. × ananassa* were maintained in 1 L pots in polytunnels. Runner plants were  
128 pinned down into 9 cm diameter pots filled with autoclaved 1:1 peat-based compost:sand. The clones  
129 were grown on for three weeks to establish their own root system and then were cut from the mother  
130 plant. Inoculations were performed as described previously (van de Weg et al., 1996). Plants were  
131 placed in a growth chamber with 16/8 hour light/dark cycle at a constant 15 °C. Inoculated plants  
132 stood in a shallow layer of tap water (2 - 7 mm) for the entire experiment and were watered from  
133 above twice a week. After six weeks, plants were dug up and the roots were rinsed to remove the  
134 soil/sand mix. Roots were then assessed for distinctive disease symptoms of ‘rat’s tails’, which is the  
135 dieback from the root tip and ‘red core’, which is the red discolouration of the internal root visible  
136 when longitudinally sliced open. Samples for which infection was unclear were visualised under a  
137 light microscope for the presence of oospores. This was performed through squash-mounting of the  
138 root tissue, where a sample of root was excised and pressed between a microscope slide and cover  
139 slip. This sample was then examined at 40x magnification under high light intensity with a Leitz  
140 Dialux 20 light microscope.

## 141 **Sequencing of DNA**

142 For Illumina sequencing, gDNA was extracted from 300 mg of freeze-dried mycelium using the  
143 Macherey-Nagel NucleoSpin<sup>®</sup> Plant II Kit. The manufacturer's protocol was modified by doubling  
144 the amount of lysis buffer PL1 used, increasing the incubation following RNase A addition by five  
145 minutes, doubling the volume of buffer PC and eluting in two steps with 35 µL of buffer PE warmed  
146 to 70 °C. For PacBio and Oxford Nanopore Technologies (ONT) sequencing, gDNA was extracted  
147 using the Genomic-Tip DNA 100/G extraction kit, following the Tissue Sample method.

148 To create Illumina PCR-free libraries, DNA was sonicated using a Covaris M220 and size-  
149 selected using a BluePippin BDF1510 1.5% gel selecting for 550 bp. Libraries were constructed using  
150 the NEBNext enzymes: End repair module (E6050), A-Tailing module (E6053), Blunt T/A ligase  
151 (M0367) and Illumina single-indexed adapters. Sequencing was performed to generate 2 x 300 bp

152 reads on a MiSeq™ system using MiSeq Reagent Kit V3 600 cycle (MS-102-3003). PacBio library  
153 preparation and sequencing was performed by the Earlham Institute, UK on a PacBio RS II machine.  
154 ONT sequencing libraries were created using the SQK-LSK108 kit following the manufacturer's  
155 protocol and sequenced using the FAH69834 FLO-MIN106 flow cell on a GridION for approximately  
156 28 hours.

### 157 **Inoculation time course experiment**

158 Growth of isolates for inoculations were performed on fresh KBA plates for approximately 14 days  
159 as described above, before the mycelium had reached the plate edge. Plugs of mycelium growing on  
160 agar were taken using a flame sterilised 10 mm diameter cork borer and plugs were submerged in  
161 chilled stream water. Plates were incubated in constant light for three days at 13 °C, with the water  
162 changed every 24 hours. For the final 24 hours, chilled Petri's solution (Judelson et al., 1993) was  
163 used. Roots of micropropagated *F. × ananassa* 'Hapil' plants (GenTech, Dundee, UK), maintained  
164 on *Arabidopsis thaliana* salts (ATS) media (Taylor et al., 2016), were submerged for one hour before  
165 transferring back to ATS plates. These plates were kept at 15 °C, with 16/8 hour light/dark cycle, with  
166 a photosynthetic photon flux (PPF) of 150  $\mu\text{mol m}^{-2} \text{s}^{-1}$  provided by fluorescent lamps  
167 (FL40SSENW37), in a Panasonic MLR-325H controlled environment chamber. Root tissue was  
168 harvested at a selection of time points post inoculation by rinsing root tissue successively in three  
169 beakers of sterile dH<sub>2</sub>O to remove all media. Roots were separated below the crown tissue, flash frozen  
170 in liquid nitrogen and stored at -80 °C.

171 Extraction of total RNA from inoculated root tissue was performed similarly to the previously  
172 described 3% CTAB<sub>3</sub> method (Yu et al., 2012). Briefly, plant material was disrupted under liquid  
173 nitrogen in a mortar and pestle, previously decontaminated through cleaning with RNaseZap™  
174 solution and baking for 2 hours at 230 °C to deactivate RNase enzymes. This material was transferred  
175 to a warmed extraction buffer (Yu et al., 2012) containing  $\beta$ -mercaptoethanol with 0.01 g of PVPP  
176 added per 0.1 g of frozen tissue. The remaining steps were performed as previously described (Yu et  
177 al., 2012), except that 60  $\mu\text{L}$  DEPC-treated H<sub>2</sub>O was used to elute RNA.

178 Mycelium was grown in liquid pea both and dried on a Q100 90 mm filter paper (Fisher  
179 Scientific) using a Büchner funnel and a Büchner flask attached to a vacuum pump. Total RNA was  
180 then extracted using the QIAGEN RNEasy Plant Mini kit with the RLC buffer. Extraction was carried  
181 out following the manufacturer's instructions with an additional spin to remove residual ethanol.

182 RNA was checked for quality using a NanoDrop 1000 spectrophotometer, quantity with a  
183 Qubit 2.0 Fluorometer and integrity with a TapeStation 4200 before being prepared for sequencing  
184 via Reverse Transcription-Polymerase Chain Reaction (RT-PCR) and sequencing on an Illumina  
185 HiSeq™ 4000 by Novogene, Hong Kong, Special Administrative Region, China. Timepoints for  
186 sequencing were selected through the detection of  $\beta$ -tubulin transcripts by RT-PCR. Reverse  
187 transcription was performed with the SuperScript™ III Reverse Transcriptase kit with an equal  
188 amount of RNA used for each sample. The complementary DNA (cDNA) was then analysed by PCR  
189 with 200  $\mu$ M dNTPs, 0.2  $\mu$ M of each primer (detailed in **Supplementary Table S1**), 2  $\mu$ L of cDNA  
190 template and 2.5 units of Taq DNA polymerase and the buffer supplied in a 20  $\mu$ L reaction. Reactions  
191 were conducted in a Veriti 96-well thermocycler with an initial denaturation step at 95 °C for 30  
192 seconds, followed by 35 cycles of a denaturation step at 95 °C for 30 seconds, an annealing  
193 temperature of 60 °C for 30 seconds and an extension step of 72 °C for 30 seconds. This was followed  
194 by a final extension step of 72 °C for 5 minutes and held at 10 °C. Products were visualised by gel  
195 electrophoresis on a 1% w/v agarose gel at 80 V for 90 minutes, stained with GelRed. Following this,  
196 three biological replicates of samples taken at: 24 hpi, 48 hpi and 96 hpi for BC-16, 48 hpi for BC-1  
197 and 72 hpi for NOV-9 were sequenced (**Supplementary Figure S1**). Additionally, *in vitro* mycelial  
198 RNA was sequenced.

199 *P. rubi* RNA-Seq reads were sequenced on a HiSeq™ 2000 system.

## 200 **Genome assembly**

201 Prior to assembly, Illumina reads were cleaned and sequencing adaptors were removed with fastq-mcf  
202 (Aronesty, 2013). Quality control of PacBio data was performed by the Earlham Institute, Norwich,  
203 UK. ONT reads were basecalled with Albacore version 2.2.7 and adaptors were removed with  
204 Porechop version 0.2.0 (Wick, 2018) and the trimmed reads were corrected with Canu version 1.4  
205 (Koren et al., 2017).

206 Assemblies of isolates sequenced solely with Illumina data were generated with SPAdes  
207 version 3.11.0 (Bankevich et al., 2012) with Kmer sizes of 21, 33, 55, 77, 99 and 127. PacBio reads  
208 were assembled using FALCON-Unzip (Chin et al., 2016). FALCON version  
209 0.7+git.7a6ac0d8e8492c64733a997d72a9359e1275bb57 was used, followed by FALCON-Unzip  
210 version 0.4.0 and Quiver (Chin et al., 2013). Error corrected ONT reads were assembled using  
211 SMARTdenovo version 1.0.0 (Ruan, 2018).

212           Following assembly, error correction was performed on ONT assemblies by aligning the reads  
213 to the assembly with Minimap2 version 2.8r711-dirty (Li, 2018) to inform ten iterations of Racon  
214 version 1.3.1 (Vaser et al., 2017). Following this, reads were again mapped to the assembly and errors  
215 were corrected with Nanopolish version 0.9.0 (Simpson, 2018). PacBio and ONT assemblies had  
216 Illumina reads mapped with Bowtie 2 version 2.2.6 (Langmead and Salzberg, 2012) and SAMtools  
217 version 1.5 (Li et al., 2009) to allow for error correction with ten iterations of Pilon version 1.17  
218 (Walker et al., 2014).

219           Following assembly, all contigs smaller than 500 bp were discarded and assembly statistics  
220 were collected using Quast version 3.0 (Gurevich et al., 2013). BUSCO statistics were collected with  
221 BUSCO version 3.0.1 (Simão et al., 2015) using the eukaryota\_odb9 database on the assemblies, as  
222 the stramenopile database was not available at the time of the analysis. Identification of repetitive  
223 sequences was performed with Repeatmasker version open-4.0.5 (Smit et al., 2015) and  
224 RepeatModeler version 1.73 (Smit and Hubley, 2015). Transposon related sequences were identified  
225 with TransposonPSI release 22<sup>nd</sup> August 2010 (Haas, 2010).

## 226 **Prediction of gene models and effectors**

227 Gene and effector prediction was performed similarly to a previously described method (Armitage et  
228 al., 2018). Firstly, raw RNA-Seq reads of BC-16 from both mycelial samples and the inoculation time  
229 course were cleaned with fastq-mcf (Aronesty, 2013). Reads from the inoculation time course were  
230 first aligned to the *Fragaria vesca* version 1.1 genome (Shulaev et al., 2011) with STAR version  
231 2.5.3a (Dobin et al., 2013) and unmapped reads were kept. These unmapped reads and those from *in*  
232 *vitro* mycelium were mapped to the assembled *P. fragariae* genomes with STAR (Dobin et al., 2013).  
233 RNA-Seq data from *P. rubi* were aligned to *P. rubi* assemblies with the same method. Further steps  
234 were performed as previously described (Armitage et al., 2018). Additionally, putative apoplastic  
235 effectors were identified through the use of ApoplastP (Sperschneider et al., 2018). Statistical  
236 significance of the differences between predicted numbers of effector genes was assessed with a  
237 Welch two sample t-test in R version 3.4.3 (R core team, 2017).

## 238 **Gene orthology analysis**

239 Orthologue identification was performed using OrthoFinder version 1.1.10 (Emms and Kelly, 2015)  
240 on predicted proteins from all sequenced *P. fragariae* and *P. rubi* isolates. Orthogroups were  
241 investigated for expanded and unique groups for races UK1, UK2 and UK3. Unique orthogroups were



242 those containing proteins from only one race and expanded orthogroups were those containing more  
243 proteins from a specific race than other races. Venn diagrams were created with the VennDiagram R  
244 package version 1.6.20 (Chen and Boutros, 2011) in R version 3.2.5 (R Core Team, 2016).

## 245 **Identification and analysis of variant sites and population structure**

246 Variant sites were identified through the use of the GATK version 3.6 HaplotypeCaller in diploid  
247 mode (McKenna et al., 2010) following alignment of Illumina reads for all sequenced isolates to the  
248 FALCON-Unzip assembled genome with Bowtie 2 version 2.2.6 (Langmead and Salzberg, 2012) and  
249 filtered with vcflib (Garrison, 2012) and VCFTools (Danecek et al., 2011). Additionally, structural  
250 variants were identified with SvABA (Wala et al., 2018) following the alignment of Illumina reads  
251 from all sequenced isolates to the FALCON-Unzip assembled genome with BWA-mem version 0.7.15  
252 (Li, 2013). Population structure was assessed with fastSTRUCTURE (Raj et al., 2014) following  
253 conversion of the input file with Plink version 1.90 beta (Purcell et al., 2007). Finally, a custom Python  
254 script was used to identify variant sites private to races UK1, UK2 or UK3 (see Availability of  
255 Computer Code below).

## 256 **Assessment of gene expression levels and the identification of candidate avirulence** 257 **genes**

258 RNA-Seq reads of BC-1, BC-16 and NOV-9 were aligned to the assembled genomes of BC-1, BC-16  
259 and NOV-9 as described above. Expression levels and differentially expressed genes were identified  
260 with featureCounts version 1.5.2 (Liao et al., 2014) and the DESeq2 version 1.10.1 R package (Love  
261 et al., 2014). Multiple test correction was performed as part of the analysis within the DESeq2  
262 package.

263 Candidate avirulence genes were identified through the analysis of uniquely expressed genes  
264 and uniquely differentially expressed genes for each of the three isolates. Uniquely expressed genes  
265 were those with a Fragments Per Kilobase of transcript per Million mapped reads (FPKM) value  
266 greater than or equal to 5 in any time point from the inoculation time course experiment for a single  
267 isolate. Uniquely differentially expressed genes were those with a minimum LFC of 3 and a *p*-value  
268 threshold of 0.05. Genes were compared between isolates through the use of orthology group  
269 assignments described above and scored on a one to six scale, with five and six deemed high  
270 confidence and one and two deemed as low confidence.

271 To identify homologous genes in other *Phytophthora* spp., candidate RxLRs were processed  
272 by SignalP-5.0 (Armenteros et al., 2019) to identify the cleavage site. The signal peptide sequence  
273 was removed before being submitted for a tblastn (Altschul et al., 1997) search on GenBank;  
274 interesting top hits are reported.

275 The expression levels of a strong candidate *PfAvr2* gene, PF003\_g27513 and a candidate  
276 *PfAvr3* gene, PF009\_g26276, were assessed via RT-qPCR. RNA-Seq results for reference genes  
277 identified previously in *Phytophthora parasitica* (Yan and Liou, 2006) were examined for stability of  
278 expression levels, resulting in the selection of  $\beta$ -tubulin (PF003\_g4288) and WS41 (PF003\_g28439)  
279 as reference genes. Primers were designed using the modified Primer3 version 2.3.7 implemented in  
280 Geneious R10 (Untergasser et al., 2012). Reverse transcription was performed on three biological  
281 replicates of each sequenced timepoint, alongside: 24 hpi, 72 hpi and 96 hpi for BC-1 and 24 hpi, 48  
282 hpi and 96 hpi for NOV-9 with the QuantiTect Reverse Transcription Kit. Quantitative PCR (qPCR)  
283 was then performed in a CFX96™ Real-Time PCR detection system in 10  $\mu$ L reactions of: 5  $\mu$ L of  
284 2x qPCRBIO SyGreen Mix Lo-Rox, 2  $\mu$ L of a 1:3 dilution of the cDNA sample in dH<sub>2</sub>O and 0.4  $\mu$ L  
285 of each 10  $\mu$ M primer and 2.2  $\mu$ L dH<sub>2</sub>O. The reaction was run with the following conditions: 95 °C  
286 for 3 minutes, 39 cycles of 95 °C for 10 seconds, 62 °C for 10 seconds and 72 °C for 30 seconds. This  
287 was followed by 95 °C for 10 seconds, and a 5 second step ranging from 65 °C to 95 °C by 0.5 °C  
288 every cycle. At least two technical replicates for each sample were performed and the melt curve  
289 results were analysed to ensure the correct product was detected. Relative gene expression was  
290 calculated using the comparative cycle threshold ( $C_T$ ) method (Livak and Schmittgen, 2001). Where  
291 there was a difference of at least 1  $C_T$  value between the minimum and maximum results for technical  
292 replicates, further reactions were conducted. Outlier technical replicates were first identified as being  
293 outside 1.5 times the interquartile range. Following this, additional outliers were identified using the  
294 Grubb's test and excluded from the analysis. Technical replicates were averaged for each biological  
295 replicate and expression values were calculated as the mean of the three biological replicates.

## 296 **Investigation of *cis* and *trans* variations for strong candidate avirulence gene**

297 The regions upstream and downstream of PF003\_g27513 and PF009\_g26276 in the FALCON-Unzip  
298 assembly of BC-16 and the SMARTdenovo assembly of NOV-9 were aligned with MAFFT in  
299 Geneious R10 (Kato et al., 2002; Kato and Standley, 2013). Variant sites were identified through  
300 visual inspection of the alignment alongside visualisation of aligned short reads from BC-16 and

301 NOV-9 to both assemblies with Bowtie 2 version 2.2.6 (Langmead and Salzberg, 2012) in IGV  
302 (Thorvaldsdóttir et al., 2013).

303 Transcription factors were identified with a previously described HMM of transcription factors  
304 and transcriptional regulators in Stramenopiles (Buitrago-Flórez et al., 2014). These proteins were  
305 then analysed through methods described above for gene loss or gain, nearby variant sites and  
306 differential expression between isolates.

### 307 **Availability of computer code**

308 All computer code is available at:

309 [https://github.com/harrisonlab/phytophthora\\_fragariae](https://github.com/harrisonlab/phytophthora_fragariae),

310 [https://github.com/harrisonlab/phytophthora\\_rubi](https://github.com/harrisonlab/phytophthora_rubi)

and

311 [https://github.com/harrisonlab/popgen/blob/master/snp/vcf\\_find\\_difference\\_pop.py](https://github.com/harrisonlab/popgen/blob/master/snp/vcf_find_difference_pop.py).

312

## 313 **RESULTS**

### 314 **Race typing allowed standardisation of US and UK race nomenclature**

315 The *P. fragariae* isolates A4 (race US4), BC-1 (race CA1), BC-16 (race CA3), NOV-5 (race CA1),  
316 NOV-9 (race CA2), NOV-27 (race CA2) and NOV-71 (race CA2) (**Table 1**) were phenotyped on a  
317 differential series of four *F. × ananassa* cultivars with known resistance. These were: ‘Allstar’  
318 (containing *Rpf1*, *Rpf2* and *Rpf3*), ‘Cambridge Vigour’ (containing *Rpf2* and *Rpf3*), ‘Hapil’  
319 (containing no resistance genes) and ‘Redgauntlet’ (containing *Rpf2*) (van de Weg et al., 1996; R.  
320 Harrison, unpublished). Following assessment of below ground symptoms, it was shown that race  
321 CA1 was equivalent to UK1, race CA2 was equivalent to UK3, race CA3 was equivalent to UK2 and  
322 race US4 was equivalent to UK2 (**Figure 1; Table 2**).

### 323 **A highly contiguous genome assembly of BC-16**

324 Long read PacBio sequencing generated a highly contiguous *P. fragariae* isolate BC-16 (UK2)  
325 reference genome of 91 Mb in 180 contigs with an N50 value of 923.5 kb (**Table 3**). This was slightly  
326 larger than the closely related, well studied species from Clade 7, *P. sojae*, at 83 Mb (**Table 3**; Tyler  
327 et al., 2006). The BC-16 assembly contained 266 of 303 eukaryotic Benchmarking Universal Single-  
328 Copy Orthologs (BUSCO) genes (**Table 4**), compared to 270 in *P. sojae* (Armitage et al., 2018) and  
329 so likely represented a similar completeness of the genome as the *P. sojae* assembly. The *P. fragariae*

330 genome was shown to be highly repeat rich, with 38% of the assembly identified as repetitive or low  
331 complexity, a larger value than the 29% shown for *P. sojae* (Armitage et al., 2018). A total of 37,049  
332 genes encoding 37,346 proteins were predicted in the BC-16 assembly, consisting of 20,222 genes  
333 predicted by BRAKER1 (Hoff et al., 2016) and 17,131 additional genes added from CodingQuarry  
334 (Testa et al., 2015). From these gene models, 486 putative RxLR effectors, 82 putative crinkler  
335 effectors (CRNs) and 1,274 putative apoplastic effectors were identified (**Table 5**). Additionally, a  
336 total of 4,054 low confidence gene models were added from intergenic ORFs identified as putative  
337 effectors. These consisted of 566 putative RxLRs, 5 putative CRNs and 3,483 putative apoplastic  
338 effectors. This resulted in a combined total of 41,103 genes encoding 41,400 proteins with 1,052  
339 putative RxLRs, 85 putative CRNs and 4,757 putative apoplastic effectors (**Table 3** and **Table 5**).

340 **A comparable number of effector genes were identified through resequencing of isolates of**  
341 ***Phytophthora fragariae* and *Phytophthora rubi***

342 Ten isolates of *P. fragariae* and three isolates of *P. rubi* were additionally resequenced, *de novo*  
343 assembled and annotated (**Table 1** and **Table 4**). These isolates showed similar assembly statistics  
344 within and between species; an average of 79 Mb in 12,804 contigs with an N50 of 19.3 kb in *P.*  
345 *fragariae*, compared to an average of 78 Mb in 13,882 contigs with an N50 of 16.8 kb in *P. rubi*. All  
346 assemblies showed 31% of the assembly was identified as repetitive or low complexity sequences. On  
347 average both *P. fragariae* and *P. rubi* showed high levels of completeness, with an average of 274/303  
348 BUSCO genes identified as single copies in these assemblies. Interestingly, a total of 17 genes were  
349 consistently not identified in Illumina, PacBio and Nanopore assemblies of *P. fragariae* and *P. rubi*  
350 isolates, suggesting these genes may be absent from these species and as such may not be considered  
351 true eukaryotic BUSCO genes. An average of 67 CRNs were predicted in *P. fragariae* and an average  
352 of 118 CRNs in *P. rubi*. A significantly ( $p = 0.013$ ) smaller number of RxLRs were predicted in *P.*  
353 *rubi* isolates than *P. fragariae* isolates alongside a significantly ( $p = 0.039$ ) smaller number of  
354 apoplastic effectors predicted in *P. rubi* than *P. fragariae* (**Table 5**). However, it is important to note  
355 that these effectors were predicted from a subset of secreted proteins, of which there were significantly  
356 ( $p = 0.030$ ) fewer predicted in *P. rubi* than in *P. fragariae* (**Table 5**).

357 **No distinguishing gene loss or gain; or the presence of INDELs or SNPs in candidate avirulence**  
358 **genes could be found associated with race variation**

359 An orthology analysis of all predicted proteins from the isolates of *P. fragariae* and *P. rubi* assigned  
360 481,942 (98.7%) proteins to 38,891 orthogroups. Of these groups, 17,101 contained at least one  
361 protein from all fourteen sequenced isolates and 13,132 of these groups consisted entirely of single-  
362 copy proteins from each isolate. There were 2,345 of these groups unique to *P. rubi* and 1,911 of these  
363 groups unique to *P. fragariae*. Analysis of unique and expanded orthogroups for isolates of the UK1,  
364 UK2 and UK3 races did not lead to the identification of candidate avirulence genes, as these groups  
365 did not contain putative effector genes (**Figure 2**).

366 A total of 725,444 SNP sites and 95,478 small INDELs were identified within the *P. fragariae*  
367 and *P. rubi* isolates by the Genome Analysis ToolKit (GATK) haplotypcaller (McKenna et al., 2010)  
368 and 80,388 indels and 7,020 structural variants were identified by SvABA (Wala et al., 2018).  
369 Analysis of high quality, biallelic SNP sites allowed the identification of a distinct population  
370 consisting of the isolates of race UK1, UK2 and UK3, hereafter referred to as the UK1-2-3 population,  
371 with SCRP245, the only UK isolate, potentially forming an ancestral or hybrid isolate between the  
372 UK1-2-3 population and the population represented by BC-23 and ONT-3 (**Figure 3; Supplementary**  
373 **Figure S2**). Additionally, clear separation between isolates of *P. fragariae* and *P. rubi* was observed.  
374 Further analysis within the UK1-2-3 population allowed for the identification of private variants,  
375 which were only present in isolates of one of the three races in this population. This resulted in the  
376 identification of eleven private variants in the UK2 race shared between both A4 and BC-16; however,  
377 neither the genes they fell within or were neighbours to were predicted to encode effectors or secreted  
378 proteins and likely did not explain the differences in pathogenicity.

379 **Wide scale transcriptional reprogramming of effectors during strawberry infection**

380 RNA-Seq data were generated from an inoculation time course experiment for representatives of races  
381 UK1, UK2 and UK3; BC-1, BC-16 and NOV-9 respectively. Following determination of expression  
382 levels of the predicted genes in both *in planta* and mycelia samples, a correlation analysis showed  
383 biological replicates of each timepoint grouped together (**Figure 4**). Additionally, the 48 hours post  
384 inoculation (hpi) BC-1 time point grouped with the BC-16 24 hpi time point, suggesting these may  
385 represent similar points in the infection process. However, clear separation between the BC-16  
386 timepoints was observed (**Figure 4**). A total of 13,240 transcripts from BC-16 (32%) showed  
387 expression above a FPKM value threshold of five in at least one sequenced BC-16 time point and

388 9,329 (23%) of these showed evidence of differential expression in at least one sequenced *in planta*  
389 time point compared to mycelium grown in artificial media, suggesting large scale transcriptional  
390 reprogramming. As three time points post inoculation were sequenced for BC-16, the changes in  
391 expression over the course of the infection process was investigated. A total of 2,321 transcripts (6%)  
392 showed a Log<sub>2</sub> Fold Change (LFC) greater than or equal to one or less than or equal to minus one,  
393 representing a general reprofiling during infection in comparison to growth in artificial media. Of  
394 transcripts differentially expressed *in planta* compared to artificial media, fewer transcripts were  
395 differentially expressed at both 24 hpi and 96 hpi than between sequential timepoints (297 compared  
396 to 1,016 and 1,604 transcripts). This suggested that changes during the progress of infection were  
397 captured by this dataset (**Figure 5**).

398 Levels of expression of effector genes were also assessed. A total of 274 (26%) RxLR  
399 effectors, 27 (31%) CRNs and 880 (18%) putative apoplastic effectors from BC-16 showed evidence  
400 of expression above the FPKM threshold of 5 in at least one sequenced time point. The majority of  
401 these effector genes also showed evidence of differential expression during *in planta* time points  
402 compared to *in vitro* mycelium. A total of 253 (24%) RxLR effectors, 19 (22%) CRNs and 888 (18%)  
403 putative apoplastic effectors showed an LFC greater than or equal to one or less than or equal to minus  
404 one, representing wide scale transcriptional reprogramming of effector genes during infection (**Figure**  
405 **5**). Ranking of the 50 highest expressed genes *in planta* with a LFC of  $\geq 3$  in comparison to its  
406 respective mycelium, identified four putative RxLR genes that were upregulated by all three isolates  
407 (**Table 6**). These genes represent putative core *P. fragariae* RxLR's important for pathogenicity on  
408 strawberry. Interestingly, a BLASTP search of one of these putative core effectors, PF003\_g16448  
409 (amino acids 19-139), showed homology to *P. sojae Avr1b* (58 % pairwise identity), GenBank  
410 accession AF449625 (Shan et al., 2004).

#### 411 **RxLR effector PF003\_g27513 is a strong candidate for *PfAvr2***

412 Comparing transcripts with the highest LFC (*in planta* vs mycelium) between isolates led to the  
413 identification of the putative RxLR effector encoding transcript PF003\_g27513.t1 as a potential  
414 candidate for *PfAvr2* in BC-16. PF003\_g27513 had a peak FPKM value in BC-16 of 9,392 compared  
415 to peaks of 5 and 34, in BC-1 and NOV-9, respectively (**Supplementary Table S2**). Subsequent RT-  
416 qPCR analysis of further timepoints in the *in planta* timecourse supported the findings of the RNA-  
417 Seq timepoints and showed the expression of putative *PfAvr2* in the UK2 isolates BC-16 and A4 was  
418 significantly ( $p < 0.05$ ) different to those from all samples of BC-1 (UK1) and NOV-9 (UK3; **Figure**

419 **6).** A BLASTP search of PF003\_g16448 (amino acids 26-137) revealed homology to *P. sojae*  
420 *Avh6/Avr1d* (37 % pairwise identity), GenBank accession JN253642 (Wang et al., 2011; Na et al.,  
421 2013).

422 The surrounding sequence of putative *PfAvr2* in BC-16, BC-1 and NOV-9 was investigated  
423 for sequence variants that may explain the expression difference. As no variants were identified near  
424 the gene from the above mentioned variant panel, an assembly of the NOV-9 isolate was created from  
425 Nanopore sequencing data, producing an assembly of 93.72 Mbp in 124 contigs with an N50 of 1,260  
426 Kb. This resulted in the identification of a SNP from T in BC-16 to G in NOV-9 ~14 Kb downstream  
427 of the stop codon and a 30 bp insertion in NOV-9 ~19 Kb upstream of the start codon (**Figure 7A**).  
428 The upstream variant appeared to be a sequencing error following the investigation of the alignment  
429 of short reads of BC-16 and NOV-9 to each assembly and so was rejected. Expression of the genes  
430 surrounding PF003\_g27513 was investigated and PF003\_g27514, directly upstream of putative  
431 *PfAvr2* is expressed by all three isolates (**Supplementary Table S2**).

432 Additionally, putative transcription factors and transcriptional regulators were identified in all  
433 sequenced genomes. This resulted in the identification of 269 genes in the BC-16 isolate of *P.*  
434 *fragariae*. However, analysis of gene loss or gain and an investigation of variant sites showed no race  
435 specific differences, though expression level variation was observed.

#### 436 **RxLR effector PF009\_g26276 is a putative candidate for *PfAvr3***

437 Further analysis of the RNA-Seq datasets identified the putative RxLR effector encoding transcript  
438 PF009\_g26276 (an orthologue of PF003\_g27386) as a potential candidate for *PfAvr3* in NOV-9, with  
439 a peak FPKM value in NOV-9 of 199 compared to *in planta* peaks of 6 and 12 in BC-1 and BC-16,  
440 respectively (**Supplementary Table S3**). Similar to putative *PfAvr2*, no sequence differences in  
441 putative *PfAvr3* were observed between the three isolates. Analysis of the surrounding region between  
442 NOV-9 and BC-16 showed no sequence differences 13,000 bp upstream and 3,761 bp downstream of  
443 PF009\_g26276 (**Figure 7B**). The two genes upstream from putative *PfAvr3* are not expressed in any  
444 isolate (**Supplementary Table S3**), whereas the gene directly downstream in BC-16, PF003\_g27385,  
445 is expressed by all the three isolates analysed.

446 Subsequent RT-qPCR analysis of further timepoints in the *in planta* time course revealed that  
447 the putative *PfAvr3* was not expressed during any timepoints by the UK1 isolate BC-1 or by the UK2  
448 isolates BC-16 and A4 (**Supplementary Figure S3**). However, absolute expression of

449 PF009\_g26276 in NOV-9 remained low. Expression in NOV-9 at 72 hpi was significantly ( $p < 0.05$ )  
450 greater than those from all samples of BC-1, BC-16 and A4.

#### 451 **Candidate genes for *PfAvr1* identified from expression level variation**

452 Analysis of the RNA-Seq datasets did not reveal an obvious candidate for *PfAvr1*. Further analysis  
453 using custom scripts identified genes, which were uniquely expressed in BC-1 and those uniquely  
454 differentially expressed. These genes were scored for confidence of race avirulence determinant; high,  
455 medium and low. No genes were identified in the high confidence class in BC-1, but four genes were  
456 scored as medium confidence, one of which was a putative apoplastic effector (**Supporting**  
457 **Candidate Table**). The analysis was repeated for BC-16 and NOV-9, in case the putative RxLR  
458 candidates are not *PfAvr2* and *PfAvr3*, respectively (**Supporting Candidate Table**).

459

## 460 **DISCUSSION**

461 Understanding pathogenicity of plant pathogens is critical for developing durable resistance strategies.  
462 *P. fragariae* is a continuing threat to strawberry production. The UK1-2-3 population displayed clear  
463 separation from the other isolates of *P. fragariae* in this study. Two putative avirulence candidates for  
464 UK2 and UK3 were identified through population resequencing and analyses of gene expression  
465 during *P. fragariae* infection. We have shown that there are no distinguishing gene loss or gain events,  
466 INDELs or SNPs associated with race variation in UK1-2-3. Our results also suggest that the  
467 polymorphisms associated with avirulence to race UK2 and UK3 resistance is controlled *in trans* or  
468 with other stable forms of epigenetic modulating gene expression.

469 This study utilised long read sequencing technologies to improve the contiguity of the *P.*  
470 *fragariae* genome through the assembly of a greater amount of repeat rich sequence. Though this  
471 assembly still fell short of the estimated chromosome number of 10 - 12 (Brasier et al., 1999), at 180  
472 contigs, it is a significant improvement over the previous assemblies that utilised solely short read  
473 technologies and produced relatively fragmented assemblies, comprised of >1,000 contigs each (Gao  
474 et al., 2015; Tabima et al., 2017). The increase in size of the assembly presented (91 Mb), suggests  
475 that the assembly includes an increased amount of repetitive sequence, indicating that it represents a  
476 more complete genome assembly than previous attempts. Although the assembly presented here was  
477 larger than previously reported assemblies, it is similar in size to the related Clade 7b species *P. sojiae*  
478 (95 Mb; Tyler et al., 2006). This study produced assemblies of an additional ten isolates of *P. fragariae*  
479 and three isolates of the closely related raspberry pathogen *P. rubi* with short read technology. These



480 assemblies were of similar sizes and contiguity to those previously published (Gao et al., 2015;  
481 Tabima et al., 2017).

482 All assemblies produced from PacBio and Illumina sequencing were annotated and putative  
483 effector genes were predicted. The gene model totals are likely inflated, due to the use of a greedy  
484 approach to effector gene prediction, to ensure the capture of all possible virulence genes. ApoplastP  
485 appeared to over-predict effectors, likely due to statistical issues arising from the use of a training set  
486 far smaller than the query set used in this study (Pritchard and Broadhurst, 2014). Interestingly, twice  
487 as many CRNs were predicted in *P. rubi* than *P. fragariae* on average (average of 118 in *P. rubi* and  
488 67 in *P. fragariae*), though this was not consistent for all *P. rubi* isolates. In comparison to *P. sojae*,  
489 the BC-16 isolate was predicted to possess approximately 50% more RxLRs and twice as many CRNs  
490 from RNA-Seq guided gene models (Tyler et al., 2006). This difference may have been due to  
491 improvements in prediction strategies, as the number of CRNs was similar to those predicted for the  
492 Clade 1 species *P. cactorum* (Armitage et al., 2018). However for RxLR effectors this difference is  
493 likely explained by the greedy approach taken for gene prediction in this study. Following the  
494 validation of gene models by RNA-Seq data, the likely overprediction of effector genes was also  
495 shown by the low percentage of these classes of genes showing evidence of expression.

496 This work also allowed the resolution of *P. fragariae* race schemes between different  
497 countries, Canadian race 1 is equivalent to UK race 1, Canadian race 2 is equivalent to UK race 3 and  
498 both Canadian race 3 and USA race 4 is equivalent to UK race 2. This provided further support for  
499 the proposed gene-for-gene model of resistance in this pathosystem (van de Weg, 1997a). However,  
500 construction of orthology groups for all isolates of *P. fragariae* and *P. rubi* did not show the presence  
501 of proteins unique to the races UK1, UK2 and UK3. Additionally, the identification of variant sites,  
502 with the BC-16 genome acting as a reference, indicated there were only private variants present in  
503 UK2, with none identified in UK1 or UK3. None of these variants were in proximity to genes thought  
504 to be involved in pathogenicity. Additionally, analysis of population structure confirmed the  
505 previously described species separation of *P. fragariae* and *P. rubi* (Man in 't Veld, 2007; Tabima et  
506 al., 2018) and identified a subpopulation consisting of the isolates of *P. fragariae* of UK1-2-3 on  
507 which further investigations focused.

508 Transcriptome analyses led to the identification of a strong candidate for *PfAvr2*, which was  
509 shown to be highly expressed in all *in planta* BC-16 timepoints, compared to evidence of no, or very  
510 low levels of expression in any BC-1 (UK1) or NOV-9 (UK3) samples. The strongest candidate for  
511 *PfAvr3* was also shown to be differentially expressed between races, but not as highly expressed in

512 NOV-9 as observed for putative *PfAvr2*. RT-qPCR confirmed the *PfAvr2* results and additionally  
513 showed expression of *PfAvr2* in the other sequenced UK2 isolate, A4. The assay showed high levels  
514 of variability, which was due to variation between biological replicates, likely the result of the inability  
515 of the inoculation method to control the quantity of zoospores inoculating an individual plant. Further  
516 *in planta* experiments and RT-qPCR of additional isolates are required to investigate the observations  
517 of putative *PfAvr3*.

518 We propose that silencing of putative *PfAvr2* in races UK1 and UK3, enables those isolates to  
519 evade recognition in *Rpf2* possessing plants, such as ‘Redgauntlet’, but not in plants possessing ‘*Rpf1*’  
520 or ‘*Rpf3*’, respectively. Silencing of putative *PfAvr3* also enables races UK1 and UK2 to evade  
521 recognition in *Rpf3* possessing plants, as long as they also do not possess *Rpf1* and *Rpf3*.

522 Whilst the exact mechanism of putative *PfAvr2* and *PfAvr3* silencing was not identified in this  
523 study, long read sequencing of a race UK3 isolate (NOV-9) identified a single SNP, 14 kb downstream  
524 of the stop codon of putative *PfAvr2* and variation in expression of transcription factors was observed  
525 in the RNA-Seq data. This indicated that epigenetic modifications could explain the observed  
526 transcriptional variation. Transcriptional silencing of effectors is a known mechanism that  
527 *Phytophthora* spp. employ to evade the activation of host *R*-gene-mediated immunity. Investigations  
528 of the EC-1 clonal lineage of *P. infestans* revealed a variation of the ability of isolates to cause disease  
529 on potato plants possessing the *Rpi-vnt1.1* gene. It was shown, in the absence of genetic mutations,  
530 that differences in the expression level of *Avrvnt1* were detected that correlated with virulence (Pais  
531 et al., 2018). Recent work in *P. infestans* and *P. sojae* has shown evidence of adenine N6-methylation  
532 (6mA) alongside a lack of evidence of 5-methylcytosine (5mC) DNA methylation, highlighting that  
533 6mA methylation is an important epigenetic mark for the regulation of gene expression in  
534 *Phytophthora* spp. (Chen et al., 2018). It is also possible that chromatin modifications may be involved  
535 in controlling the expression differences, as demonstrated in *P. infestans* (van West et al., 2008; Chen  
536 et al., 2018). Investigation of these possibilities, while not achievable in the current study is a clear  
537 direction for future research.

538 Nearly all *P. fragariae* isolates investigated in this study were collected from around Canada  
539 between 2001-2012. The SCRP245 isolate was identified as an intermediate between the UK1-2-3  
540 population and the population represented by the BC-23 and ONT-3 isolates. SCRP245 could  
541 represent a rare hybrid of the two populations. However, due to the small sample size of isolates, the  
542 low number of SNP sites available for this analysis and the fact it was isolated in 1945 in the UK, at  
543 least 55 years before the other isolates, it appears more likely that SCRP245 represents a separate

544 population but the data available were unable to resolve this fully. Further race typing with differential  
545 strawberry genotypes is required to ascertain the relationship between isolates of Canadian races 4  
546 and 5.

547 Races of asexual species have been shown to evolve by the stepwise accumulation of  
548 mutations (Del Mar Jiménez-Gasco et al., 2004). One such example is the successive evolution of  
549 multiple pathotypes in a single clonal lineage of the wheat pathogen *Puccinia striiformis* f. sp. *tritici*  
550 in Australia and New Zealand (Steele et al., 2001). In comparison, our data do not indicate that *P.*  
551 *fragariae* has undergone simple stepwise evolution of effectors, but we rather postulate that some  
552 lineages of *P. fragariae* have been present for long periods of time in nature, evident by the large  
553 number of SNP differences and well supported branches and that the emergence of races (e.g. UK1-  
554 2-3) is fairly recent, possibly as a result of the *R*-genes deployed in commercial strawberries. The  
555 increased selection pressure on *P. fragariae* to overcome these genes, or the break-up of ‘wild’ *R*-  
556 gene stacks upon hybridisation of octoploid strawberry species, may have led to very rapid evolution  
557 of races, in this case through epigenetic silencing of gene expression, to evade the *R*-genes present in  
558 common cultivars. Substantial further sampling from multiple geographic regions would be required  
559 to fully decipher population structure in the lineages of *P. fragariae* and the resistance status of wild  
560 octoploid *Fragaria* species. We predict that this would lead to the observation of other geographically  
561 distinct lineages of genetically similar individuals of *P. fragariae* but with similar differences in  
562 pathogenicity on strawberry. The implications of these findings highlight the potential adaptability of  
563 *P. fragariae* to modify effector expression to evade host resistance and the threat of the emergence of  
564 new races. Future strawberry breeding efforts must deploy cultivars with multiple resistance genes to  
565 mitigate against the rapid adaptation of *P. fragariae*. Identifying resistance genes that recognise the  
566 conserved core RxLRs identified in this study would enable broad-spectrum resistance to this  
567 pathogen to be deployed that would be effective against multiple races. One of the conserved highly  
568 expressed RxLRs was shown to have homology to *P. sojae Avr1b* and so identifying homologous *R*-  
569 genes to *Rsp1b* in strawberry could be a future avenue of work to provide resistance against multiple  
570 races.

571 In conclusion, we have shown for the first time that within a distinct subpopulation of *P.*  
572 *fragariae* isolates, displaying remarkably low levels of polymorphisms, the ability to cause disease on  
573 a range of differing strawberry cultivars was associated with variation in transcriptional levels rather  
574 than being due to sequence variation, similar to reports in *P. infestans* (Pais et al., 2018). This work  
575 therefore has implications for the identification of putative avirulence genes in the absence of

576 associated expression data and highlights the need for detailed molecular characterisation of  
577 mechanisms of effector regulation and silencing in oomycete plant pathogens. In addition, this study  
578 presents a large amount of data, including an improved, long read assembly of *P. fragariae* alongside  
579 a collection of resequenced isolates of *P. fragariae* and *P. rubi*, and transcriptome data from multiple  
580 isolates that is a valuable resource for future studies.

581

## 582 **AUTHOR CONTRIBUTIONS**

583 RH, CN and TA devised the study. RH, CN and JD co-supervised TA's PhD study, within which  
584 some of this work was undertaken. TA performed the experimental work, with contributions from  
585 CN. AA assisted with the development of genome assembly, annotation and orthology pipelines. MS  
586 developed elements of the variant calling pipeline and structure analysis with TA. HB performed  
587 Nanopore and MiSeq sequencing. JT, BK, BT and NG provided RNA-Seq reads of *P. rubi* for genome  
588 annotation. TA drafted the manuscript with input from CN, JD and RH. All authors read and approved  
589 the submission.

590

## 591 **FUNDING**

592 This research was supported by grants awarded from the Biotechnology and Biological Sciences  
593 Research Council (BBSRC) to RH (BB/K017071/1, BB/K017071/2 and BB/N006682/1) and Sophien  
594 Kamoun (BB/K018639/1).

595

## 596 **ACKNOWLEDGEMENTS**

597 The authors gratefully acknowledge the East Malling Strawberry Breeding Club for access to  
598 strawberry material, to Dr. Andrew R. Jamieson for the *P. fragariae* isolates as well as Dr. David E.L.  
599 Cooke for the *P. rubi* isolates and *P. fragariae* SCRP245. The authors also gratefully acknowledge  
600 Prof. Sophien Kamoun, Dr. Eric van de Weg and Dr. Thijs van Dijk for useful discussions. In addition,  
601 we wish to thank the following people for the help received in the preparation and setting up of  
602 experiments Dr. Helen M. Cockerton, Dr. Laura A. Lewis and Mr. Joseph Hutchings, as well as the  
603 members of RH's group. Work was carried out under the terms of DEFRA Plant Health Licence  
604 6996/221427 held by RH/CN.

605

606

607 **DATA AVAILABILITY STATEMENT**

608 The datasets, including all assemblies and annotations, generated for this study are available on NCBI  
609 GenBank as part of BioProjects PRJNA396163 and PRJNA488213 with accession numbers of  
610 SAMN07449679 - SAMN07449692. Raw sequencing reads have been deposited in the NCBI SRA,  
611 DNA-Seq reads are available with accession codes SRR7668085 - SRR7668100 and *P. fragariae*  
612 RNA-Seq reads are available with accession codes SRR7764607 - SRR7764615. *P. rubi* RNA-Seq  
613 reads are available with the accession codes SRR10207404 - SRR10207405.

## 614 REFERENCES

- 615 Adams, T. M. (2019). Pathogenomics of *Phytophthora fragariae*, the causal agent of strawberry red  
616 core disease [PhD thesis]. [Reading (UK)]: University of Reading.
- 617 Altschul, S. F., Madden, T. L., Schäffer, A. A., Zhang, J., Zhang, Z., Miller, W., and Lipman, D. J.  
618 (1997). Gapped BLAST and PSI-BLAST: a new generation of protein database search  
619 programs. *Nucleic Acids Res.* 25, 3389-3402.
- 620 Armenteros, J. J. A., Tsirigos, K. D., Sønderby, C. K., Petersen, T. N., Winther, O., Brunak, S., et al.  
621 (2019). SignalP 5.0 improves signal peptide predictions using deep neural networks. *Nat.*  
622 *Biotechnol.* 37, 420–423. doi:10.1038/s41587-019-0036-z.
- 623 Armitage, A. D., Lysøe, E., Nellist, C. F., Lewis, L. A., Cano, L. M., Harrison, R. J., et al. (2018).  
624 Bioinformatic characterisation of the effector repertoire of the strawberry pathogen  
625 *Phytophthora cactorum*. *PLoS ONE* 13, e0202305. doi:10.1371/journal.pone.0202305.
- 626 Aronesty, E. (2013). Comparison of Sequencing Utility Programs. *Open Bioinforma. J.* 7, 1–8.  
627 doi:10.2174/1875036201307010001.
- 628 Bankevich, A., Nurk, S., Antipov, D., Gurevich, A. A., Dvorkin, M., Kulikov, A. S., et al. (2012).  
629 SPAdes: a new genome assembly algorithm and its applications to single-cell sequencing. *J.*  
630 *Comput. Biol.* 19, 455–477. doi:10.1089/cmb.2012.0021.
- 631 Bendtsen, J. D., Nielsen, H., von Heijne, G. and Brunak, S. (2004) Improved Prediction of Signal  
632 Peptides: SignalP 3.0. *J. Mol. Biol.* 340(4), 783-795. doi:10.1016/j.jmb.2004.05.028.
- 633 Brasier, C. M., Cooke, D. E., and Duncan, J. M. (1999). Origin of a new *Phytophthora* pathogen  
634 through interspecific hybridization. *Proc Natl Acad Sci USA* 96, 5878–5883.  
635 doi:10.1073/pnas.96.10.5878.
- 636 Buitrago-Flórez, F. J., Restrepo, S., and Riaño-Pachón, D. M. (2014). Identification of transcription  
637 factor genes and their correlation with the high diversity of stramenopiles. *PLoS ONE* 9,  
638 e111841. doi:10.1371/journal.pone.0111841.
- 639 Campbell, A. M., Moon, R. P., Duncan, J. M., Gurr, S.-J., and Kinghorn, J. R. (1989). Protoplast  
640 formation and regeneration from sporangia and encysted zoospores of *Phytophthora infestans*.  
641 *Physiol. Mol. Plant P.* 34, 299–307. doi:10.1016/0885-5765(89)90027-1.
- 642 Clifford, R. J., Milillo, M., Prestwood, J., Quintero, R., Zurawski, D. V., Kwak, Y. I., et al. (2012)  
643 Detection of Bacterial 16S rRNA and Identification of Four Clinically Important Bacteria by  
644 Real-Time PCR. *PLoS ONE* 7, e48558. doi:10.1371/journal.pone.0048558
- 645 Chen, H., and Boutros, P. C. (2011). VennDiagram: a package for the generation of highly-  
646 customizable Venn and Euler diagrams in R. *BMC Bioinformatics* 12, 35. doi:10.1186/1471-  
647 2105-12-35.
- 648 Chen, H., Shu, H., Wang, L., Zhang, F., Li, X., Ochola, S. O., et al. (2018). *Phytophthora*  
649 methylomes are modulated by 6mA methyltransferases and associated with adaptive genome  
650 regions. *Genome Biol.* 19, 181. doi:10.1186/s13059-018-1564-4.
- 651 Chin, C.-S., Alexander, D. H., Marks, P., Klammer, A. A., Drake, J., Heiner, C., et al. (2013).  
652 Nonhybrid, finished microbial genome assemblies from long-read SMRT sequencing data. *Nat.*  
653 *Methods* 10, 563–569. doi:10.1038/nmeth.2474.

- 654 Chin, C.-S., Peluso, P., Sedlazeck, F. J., Nattestad, M., Concepcion, G. T., Clum, A., et al. (2016).  
655 Phased diploid genome assembly with single-molecule real-time sequencing. *Nat. Methods* 13,  
656 1050–1054. doi:10.1038/nmeth.4035.
- 657 Cui, C., Herlihy, J., Bombarely, A., McDowell, J. M., and Haak, D. C. (2019). Draft assembly of  
658 *Phytophthora capsici* from long-read sequencing uncovers complexity. *Mol. Plant Microbe*  
659 *Interact.* doi:10.1094/MPMI-04-19-0103-TA.
- 660 Danecek, P., Auton, A., Abecasis, G., Albers, C. A., Banks, E., DePristo, M. A., et al. (2011). The  
661 variant call format and VCFtools. *Bioinformatics* 27, 2156–2158.  
662 doi:10.1093/bioinformatics/btr330.
- 663 Del Mar Jiménez-Gasco, M., Milgroom, M. G., and Jiménez-Díaz, R. M. (2004). Stepwise Evolution  
664 of Races in *Fusarium oxysporum* f. sp. *ciceris* Inferred from Fingerprinting with Repetitive  
665 DNA Sequences. *Phytopathology* 94, 228–235. doi:10.1094/PHYTO.2004.94.3.228.
- 666 Dobin, A., Davis, C. A., Schlesinger, F., Drenkow, J., Zaleski, C., Jha, S., et al. (2013). STAR:  
667 ultrafast universal RNA-seq aligner. *Bioinformatics* 29, 15–21.  
668 doi:10.1093/bioinformatics/bts635.
- 669 Dong, S., Qutob, D., Tedman-Jones, J., Kuflu, K., Wang, Y., Tyler, B. M., et al. (2009). The  
670 *Phytophthora sojae* avirulence locus *Avr3c* encodes a multi-copy RXLR effector with sequence  
671 polymorphisms among pathogen strains. *PLoS ONE* 4, e5556.  
672 doi:10.1371/journal.pone.0005556.
- 673 EFSA Panel on Plant Health (PLH) (2014). Scientific Opinion on the risks to plant health posed by  
674 *Phytophthora fragariae* Hickman var. *fragariae* in the EU territory, with the identification and  
675 evaluation of risk reduction options. *EFSA Journal* 12. doi:10.2903/j.efsa.2014.3539.
- 676 Emms, D. M., and Kelly, S. (2015). OrthoFinder: solving fundamental biases in whole genome  
677 comparisons dramatically improves orthogroup inference accuracy. *Genome Biol.* 16, 157.  
678 doi:10.1186/s13059-015-0721-2.
- 679 EPPO (2018). EPPO A2 List. *EPPO A2 List*. Available at:  
680 [https://www.eppo.int/ACTIVITIES/plant\\_quarantine/A2\\_list](https://www.eppo.int/ACTIVITIES/plant_quarantine/A2_list) [Accessed January 31, 2019].
- 681 Gao, R., Cheng, Y., Wang, Y., Wang, Y., Guo, L., and Zhang, G. (2015). Genome Sequence of  
682 *Phytophthora fragariae* var. *fragariae*, a Quarantine Plant-Pathogenic Fungus. *Genome*  
683 *Announc.* 3. doi:10.1128/genomeA.00034-15.
- 684 Garrison, E. (2012). *Vcfliib. A C++ library for parsing and manipulating VCF files*. Github  
685 Available at: <https://github.com/ekg/vcfliib> [Accessed December 19, 2018].
- 686 Gurevich, A., Saveliev, V., Vyahhi, N., and Tesler, G. (2013). QUASt: quality assessment tool for  
687 genome assemblies. *Bioinformatics* 29, 1072–1075. doi:10.1093/bioinformatics/btt086.
- 688 Haas, B. (2010). *TransposonPSI: an application of PSI-blast to mine (Retro-)transposon ORF*  
689 *homologies*. sourceforge Available at: <http://transposonpsi.sourceforge.net/> [Accessed January  
690 10, 2019].
- 691 Hickman, C. J. (1941). The Red Core Root Disease of The Strawberry Caused By *Phytophthora*  
692 *Fragariae* n.sp. *Journal of Pomology and Horticultural Science* 18, 89–118.  
693 doi:10.1080/03683621.1941.11513556.

- 694 Hoff, K. J., Lange, S., Lomsadze, A., Borodovsky, M., and Stanke, M. (2016). BRAKER1:  
695 Unsupervised RNA-Seq-Based Genome Annotation with GeneMark-ET and AUGUSTUS.  
696 *Bioinformatics* 32, 767–769. doi:10.1093/bioinformatics/btv661.
- 697 Judelson, H. S., Coffey, M. D., Arredondo, F. R., and Tyler, B. M. (1993). Transformation of the  
698 oomycete pathogen *Phytophthora megasperma* f. sp. *glycinea* occurs by DNA integration into  
699 single or multiple chromosomes. *Curr. Genet.* 23, 211–218. doi:10.1007/BF00351498.
- 700 Käll L., Krogh, A. and Sonnhammer, E. L. L. (2004). A Combined Transmembrane Topology and  
701 Signal Peptide Prediction Method. *J. Mol. Biol.* 338(5), 1027-1036.  
702 doi:10.1016/j.jmb.2004.03.016.
- 703 Katoh, K., Misawa, K., Kuma, K., and Miyata, T. (2002). MAFFT: a novel method for rapid  
704 multiple sequence alignment based on fast Fourier transform. *Nucleic Acids Res.* 30, 3059–  
705 3066. doi:10.1093/nar/gkf436.
- 706 Katoh, K., and Standley, D. M. (2013). MAFFT multiple sequence alignment software version 7:  
707 improvements in performance and usability. *Mol. Biol. Evol.* 30, 772–780.  
708 doi:10.1093/molbev/mst010.
- 709 Koren, S., Walenz, B. P., Berlin, K., Miller, J. R., Bergman, N. H., and Phillippy, A. M. (2017).  
710 Canu: scalable and accurate long-read assembly via adaptive k-mer weighting and repeat  
711 separation. *Genome Res.* 27, 722–736. doi:10.1101/gr.215087.116.
- 712 Langmead, B., and Salzberg, S. L. (2012). Fast gapped-read alignment with Bowtie 2. *Nat. Methods*  
713 9, 357–359. doi:10.1038/nmeth.1923.
- 714 Liao, Y., Smyth, G. K., and Shi, W. (2014). featureCounts: an efficient general purpose program for  
715 assigning sequence reads to genomic features. *Bioinformatics* 30, 923–930.  
716 doi:10.1093/bioinformatics/btt656.
- 717 Livak, K. J., and Schmittgen, T. D. (2001). Analysis of relative gene expression data using real-time  
718 quantitative PCR and the 2(-Delta Delta C(T)) Method. *Methods* 25, 402–408.  
719 doi:10.1006/meth.2001.1262.
- 720 Li, H. (2013). Aligning sequence reads, clone sequences and assembly contigs with BWA-MEM.  
721 *arXiv*.
- 722 Li, H. (2018). Minimap2: pairwise alignment for nucleotide sequences. *Bioinformatics* 34, 3094–  
723 3100. doi:10.1093/bioinformatics/bty191.
- 724 Li, H., Handsaker, B., Wysoker, A., Fennell, T., Ruan, J., Homer, et al. (2009). The Sequence  
725 Alignment/Map format and SAMtools. *Bioinformatics* 25, 2078–2079.  
726 doi:10.1093/bioinformatics/btp352.
- 727 Love, M. I., Huber, W., and Anders, S. (2014). Moderated estimation of fold change and dispersion  
728 for RNA-seq data with DESeq2. *Genome Biol.* 15, 550. doi:10.1186/s13059-014-0550-8.
- 729 Maas, J. L. (1972). Growth and reproduction in culture of ten *Phytophthora fragariae* races.  
730 *Mycopathol. Mycol. Appl.* 48, 323–334. doi:10.1007/BF02052636.
- 731 Malar C, M., Yuzon, J. D., Das, S., Das, A., Panda, A., Ghosh, S., et al. (2019). Haplotype-Phased  
732 Genome Assembly of Virulent *Phytophthora ramorum* Isolate ND886 Facilitated by Long-  
733 Read Sequencing Reveals Effector Polymorphisms and Copy Number Variation. *Mol. Plant*  
734 *Microbe Interact.* 32, 1047–1060. doi:10.1094/MPMI-08-18-0222-R.



- 735 Man in 't Veld, W. A. (2007). Gene flow analysis demonstrates that *Phytophthora fragariae* var. *rubi*  
736 constitutes a distinct species, *Phytophthora rubi* comb. nov. *Mycologia* 99, 222–226.  
737 doi:10.1080/15572536.2007.11832581.
- 738 McKenna, A., Hanna, M., Banks, E., Sivachenko, A., Cibulskis, K., Kernytsky, A., et al. (2010). The  
739 Genome Analysis Toolkit: a MapReduce framework for analyzing next-generation DNA  
740 sequencing data. *Genome Res.* 20, 1297–1303. doi:10.1101/gr.107524.110.
- 741 Na, R., Yu, D., Qutob, D., Zhao, J., and Gijzen, M. (2013). Deletion of the *Phytophthora sojae*  
742 avirulence gene *Avr1d* causes gain of virulence on *Rsp1d*. *Mol. Plant Microbe Interact.* 26(6),  
743 969–976. doi.org/10.1094/MPMI-02-13-0036-R.
- 744 Nielsen, H., Englebrect, J., Brunak S. and von Heijne G. (1997). Identification of prokaryotic and  
745 eukaryotic signal peptides and prediction of their cleavage sites. *Protein Eng.* 10(1), 1-6.  
746 doi:10.1093/protein/10.1.1.
- 747 Pais, M., Yoshida, K., Giannakopoulou, A., Pel, M. A., Cano, L. M., Oliva, R. F., et al. (2018). Gene  
748 expression polymorphism underpins evasion of host immunity in an asexual lineage of the Irish  
749 potato famine pathogen. *BMC Evol. Biol.* 18, 93. doi:10.1186/s12862-018-1201-6.
- 750 Petersen, T. N., Brunak, S., Heijne, von, G., & Nielsen, H. (2011). SignalP 4.0: discriminating signal  
751 peptides from transmembrane regions. *Nat. Methods*, 8, 785–786. doi:10.1038/nmeth.1701.
- 752 van Poppel, P. M. J. A., Guo, J., van de Vondervoort, P. J. I., Jung, M. W. M., Birch, P. R. J.,  
753 Whisson, S. C., et al. (2008). The *Phytophthora infestans* avirulence gene *Avr4* encodes an  
754 RXLR-dEER effector. *Mol. Plant Microbe Interact.* 21, 1460–1470. doi:10.1094/MPMI-21-11-  
755 1460.
- 756 Pritchard, L., and Broadhurst, D. (2014). On the statistics of identifying candidate pathogen  
757 effectors. *Methods Mol. Biol.* 1127, 53–64. doi:10.1007/978-1-62703-986-4\_4.
- 758 Purcell, S., Neale, B., Todd-Brown, K., Thomas, L., Ferreira, M. A. R., Bender, D., et al. (2007).  
759 PLINK: a tool set for whole-genome association and population-based linkage analyses. *Am. J.*  
760 *Hum. Genet.* 81, 559–575. doi:10.1086/519795.
- 761 Raj, A., Stephens, M., and Pritchard, J. K. (2014). fastSTRUCTURE: variational inference of  
762 population structure in large SNP data sets. *Genetics* 197, 573–589.  
763 doi:10.1534/genetics.114.164350.
- 764 Robinson Boyer, L., Feng, W., Gulbis, N., Hajdu, K., Harrison, R. J., Jeffries, P., et al. (2016). The  
765 use of arbuscular mycorrhizal fungi to improve strawberry production in coir substrate. *Front.*  
766 *Plant. Sci.* 7, 1237. doi:10.3389/fpls.2016.01237.
- 767 Ruan, J. (2018). *SMARTdenovo: Ultra-fast de novo assembler using long noisy reads*. Github  
768 Available at: <https://github.com/ruanjue/smartdenovo> [Accessed January 10, 2019].
- 769 R Core Team (2016). *R: A Language and Environment for Statistical Computing*. R Foundation for  
770 Statistical Computing, Vienna, Austria Available at: <https://www.R-project.org> [Accessed  
771 December 19, 2018].
- 772 R core team (2017). *R: A language and environment for statistical computing*. R Foundation for  
773 Statistical Computing, Vienna, Austria Available at: <https://www.R-project.org> [Accessed  
774 December 19, 2018].

- 775 Shan, W., Cao, M., Leung, D., & Tyler, B. M. (2004). The *Avr1b* locus of *Phytophthora sojae*  
776 encodes an elicitor and a regulator required for avirulence on soybean plants carrying resistance  
777 gene *Rps1b*. *Mol. Plant Microbe Interact.* 17(4), 394–403. doi: 10.1094/MPMI.2004.17.4.394.
- 778 Shulaev, V., Sargent, D. J., Crowhurst, R. N., Mockler, T. C., Folkerts, O., Delcher, et al. (2011).  
779 The genome of woodland strawberry (*Fragaria vesca*). *Nat. Genet.* 43, 109–116.  
780 doi:10.1038/ng.740.
- 781 Simão, F. A., Waterhouse, R. M., Ioannidis, P., Kriventseva, E. V., and Zdobnov, E. M. (2015).  
782 BUSCO: assessing genome assembly and annotation completeness with single-copy orthologs.  
783 *Bioinformatics* 31, 3210–3212. doi:10.1093/bioinformatics/btv351.
- 784 Simpson, J. (2018). *Nanopolish: Signal-level algorithms for MinION data*. Github Available at:  
785 <https://github.com/jts/nanopolish> [Accessed January 10, 2019].
- 786 Smit, A. F. A., and Hubley, R. (2015). *RepeatModeler Open-1.0*. Repeatmasker.org Available at:  
787 <http://www.repeatmasker.org> [Accessed January 10, 2019].
- 788 Smit, A. F. A., Hubley, R., and Green, P. (2015). *RepeatMasker Open-4.0*. repeatmasker.org  
789 Available at: <http://www.repeatmasker.org> [Accessed January 10, 2019].
- 790 Sperschneider, J., Dodds, P. N., Singh, K. B., and Taylor, J. M. (2018). ApoplastP: prediction of  
791 effectors and plant proteins in the apoplast using machine learning. *New Phytol.* 217, 1764–  
792 1778. doi:10.1111/nph.14946.
- 793 Steele, K. A., Humphreys, E., Wellings, C. R., and Dickinson, M. J. (2001). Support for a stepwise  
794 mutation model for pathogen evolution in Australasian *Puccinia striiformis* f.sp. *tritici* by use of  
795 molecular markers. *Plant Pathology* 50, 174–180. doi:10.1046/j.1365-3059.2001.00558.x.
- 796 Tabima, J. F., Coffey, M. D., Zazada, I. A., and Grünwald, N. J. (2018). Populations of  
797 *Phytophthora rubi* Show Little Differentiation and High Rates of Migration Among States in  
798 the Western United States. *Mol. Plant Microbe Interact.* 31, 614–622. doi:10.1094/MPMI-10-  
799 17-0258-R.
- 800 Tabima, J. F., Kronmiller, B. A., Press, C. M., Tyler, B. M., Zasada, I. A., and Grünwald, N. J.  
801 (2017). Whole Genome Sequences of the Raspberry and Strawberry Pathogens *Phytophthora*  
802 *rubi* and *P. fragariae*. *Mol. Plant Microbe Interact.* 30, 767–769. doi:10.1094/MPMI-04-17-  
803 0081-A.
- 804 Taylor, A., Vágány, V., Jackson, A. C., Harrison, R. J., Rainoni, A., and Clarkson, J. P. (2016).  
805 Identification of pathogenicity-related genes in *Fusarium oxysporum* f. sp. *cepae*. *Mol. Plant*  
806 *Pathol.* 17, 1032–1047. doi:10.1111/mpp.12346.
- 807 Testa, A. C., Hane, J. K., Ellwood, S. R., and Oliver, R. P. (2015). CodingQuarry: highly accurate  
808 hidden Markov model gene prediction in fungal genomes using RNA-seq transcripts. *BMC*  
809 *Genomics* 16, 170. doi:10.1186/s12864-015-1344-4.
- 810 Thorvaldsdóttir, H., Robinson, J. T., and Mesirov, J. P. (2013). Integrative Genomics Viewer (IGV):  
811 high-performance genomics data visualization and exploration. *Brief. Bioinformatics* 14, 178–  
812 192. doi:10.1093/bib/bbs017.
- 813 Tyler, B. M., Tripathy, S., Zhang, X., Dehal, P., Jiang, R. H. Y., Aerts, A., et al. (2006).  
814 *Phytophthora* genome sequences uncover evolutionary origins and mechanisms of pathogenesis.  
815 *Science* 313, 1261–1266. doi:10.1126/science.1128796.

- 816 Untergasser, A., Cutcutache, I., Koressaar, T., Ye, J., Faircloth, B. C., Remm, M., et al. (2012).  
817 Primer3--new capabilities and interfaces. *Nucleic Acids Res.* 40, e115. doi:10.1093/nar/gks596.
- 818 Vaser, R., Sović, I., Nagarajan, N., and Šikić, M. (2017). Fast and accurate de novo genome  
819 assembly from long uncorrected reads. *Genome Res.* 27, 737–746. doi:10.1101/gr.214270.116.
- 820 Wala, J. A., Bandopadhyay, P., Greenwald, N. F., O'Rourke, R., Sharpe, T., Stewart, C., et al.  
821 (2018). SvABA: genome-wide detection of structural variants and indels by local assembly.  
822 *Genome Res.* 28, 581–591. doi:10.1101/gr.221028.117.
- 823 Walker, B. J., Abeel, T., Shea, T., Priest, M., Abouelliel, A., Sakthikumar, S., et al. (2014). Pilon: an  
824 integrated tool for comprehensive microbial variant detection and genome assembly  
825 improvement. *PLoS ONE* 9, e112963. doi:10.1371/journal.pone.0112963.
- 826 van de Weg, W. E. (1997a). A gene-for-gene model to explain interactions between cultivars of  
827 strawberry and races of *Phytophthora fragariae* var. *fragariae*. *Theor. Appl. Genet.* 94, 445–  
828 451. doi:10.1007/s001220050435.
- 829 van de Weg, W. E. (1997b). *Gene-for-gene relationships between strawberry and the causal agent of*  
830 *red stele root rot*, *Phytophthora fragariae* var. *fragariae*.
- 831 van de Weg, W. E., Giezen, S., Henken, B., and den Nijs, A. P. M. (1996). A quantitative  
832 classification method for assessing resistance to *Phytophthora fragariae* var. *fragariae* in  
833 strawberry. *Euphytica* 91, 119–125. doi:10.1007/BF00035282.
- 834 van West, P., Shepherd, S. J., Walker, C. A., Li, S., Appiah, A. A., Grenville-Briggs, L. J., et al.  
835 (2008). Internuclear gene silencing in *Phytophthora infestans* is established through chromatin  
836 remodelling. *Microbiology* 154, 1482–1490. doi:10.1099/mic.0.2007/015545-0.
- 837 Wang, Q., Han, C., Ferreira, A. O., Yu, X., Ye, W., Tripathy, S., et al. (2011). Transcriptional  
838 programming and functional interactions within the *Phytophthora sojae* RXLR effector  
839 repertoire. *The Plant Cell.* 23(6), 2064–2086. doi.org/10.1105/tpc.111.086082.
- 840 Whisson, S. C., Boevink, P. C., Moleleki, L., Avrova, A. O., Morales, J. G., Gilroy, E. M., et al.  
841 (2007). A translocation signal for delivery of oomycete effector proteins into host plant cells.  
842 *Nature.* 450(7166), 115-118. doi:10.1038/nature06203.
- 843 Wickham, H. (2016). *ggplot2: Elegant Graphics for Data Analysis*. 2nd, illustrated ed. Springer.
- 844 Wick, R. (2018). *Porechop: adapter trimmer for Oxford Nanopore reads*. Github Available at:  
845 <https://github.com/rrwick/Porechop> [Accessed January 9, 2019].
- 846 Wilcox, W. F., Scott, P. H., Hamm, P. B., Kennedy, D. M., Duncan, J. M., Brasier, C. M., et al.  
847 (1993). Identity of a *Phytophthora* species attacking raspberry in Europe and North America.  
848 *Mycol. Res.* 97, 817–831. doi:10.1016/S0953-7562(09)81157-X.
- 849 Yan, H.-Z., and Liou, R.-F. (2006). Selection of internal control genes for real-time quantitative RT-  
850 PCR assays in the oomycete plant pathogen *Phytophthora parasitica*. *Fungal Genet. Biol.* 43,  
851 430–438. doi:10.1016/j.fgb.2006.01.010.
- 852 Yin, W., Dong, S., Zhai, L., Lin, Y., Zheng, X., and Wang, Y. (2013). The *Phytophthora sojae*  
853 *Avr1d* gene encodes an RxLR-dEER effector with presence and absence polymorphisms among  
854 pathogen strains. *Mol. Plant Microbe Interact.* 26, 958–968. doi:10.1094/MPMI-02-13-0035-R.

855 Yu, D., Tang, H., Zhang, Y., Du, Z., Yu, H., and Chen, Q. (2012). Comparison and Improvement of  
856 Different Methods of RNA Isolation from Strawberry (*Fragaria × ananassa*). *JAS* 4.  
857 doi:10.5539/jas.v4n7p51.

858

859 **Conflict of Interest Statement:** The authors declare that the research was conducted in the absence  
860 of any commercial or financial relationships that could be constructed as a potential conflict of  
861 interest.

862

863

864

865 **FIGURES**

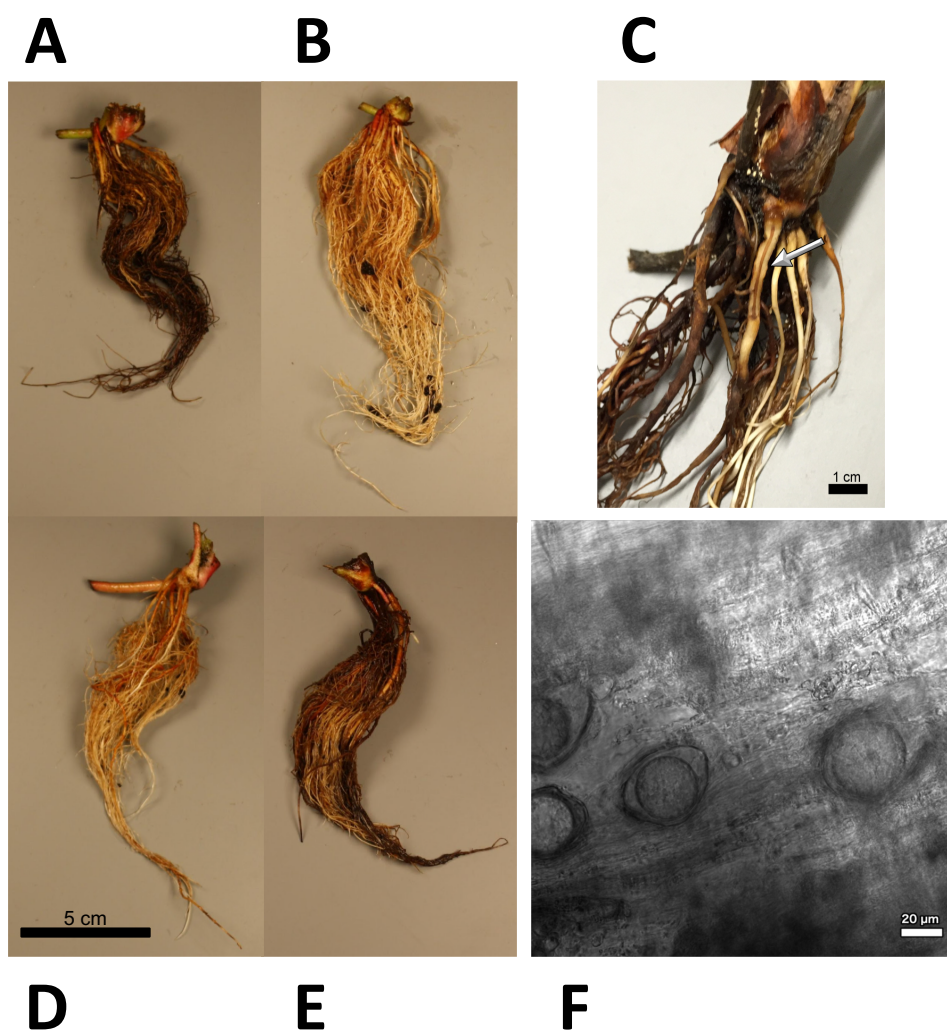

866

867 **FIGURE 1 | Observed *Phytophthora fragariae* symptoms in the cultivated strawberry (*Fragaria***  
868 ***× ananassa*).** (A,B,D,E) Roots of *Fragaria × ananassa* harvested six weeks after inoculation with  
869 *Phytophthora fragariae* mycelial slurry. (A) Successful infection of the *P. fragariae* isolate NOV-27  
870 (race CA2) on a susceptible ‘Redgauntlet’ plant (*Rpf2* only). (B) Unsuccessful infection of the *P.*  
871 *fragariae* isolate A4 (US4/UK2) on a resistant ‘Redgauntlet’ plant (*Rpf2* only). (C) Example of “red  
872 core” symptoms observed in ‘Hapil’ roots infected with BC-16, three weeks post inoculation. (D)  
873 Unsuccessful infection of the *P. fragariae* isolate NOV-27 (race CA2) on a resistant ‘Allstar’ plant  
874 (*Rpf1*, *Rpf2* and *Rpf3*). (E) Successful infection of the *P. fragariae* isolate A4 (race US4/UK2) on a  
875 susceptible ‘Hapil’ plant (no *Rpf* genes). (F) Example of BC-16 oospores observed in ‘Hapil’ roots, 3  
876 weeks post inoculation, confirming infection.

**A**

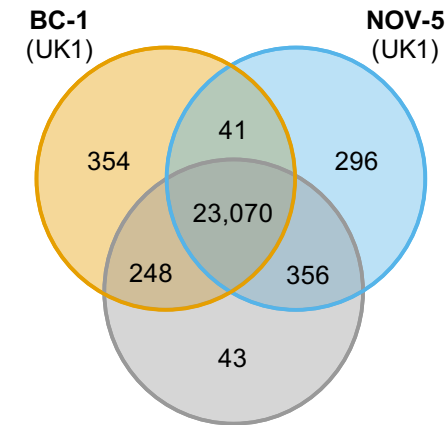

**A4 (UK2), BC-16 (UK2), NOV-9 (UK3),  
NOV-27 (UK3) & NOV-71 (UK3)**

**B**

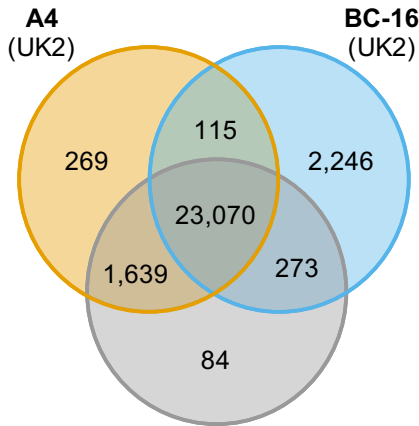

**BC-1 (UK1), NOV-5 (UK1), NOV-9 (UK3),  
NOV-27 (UK3) & NOV-71 (UK3)**

**C**

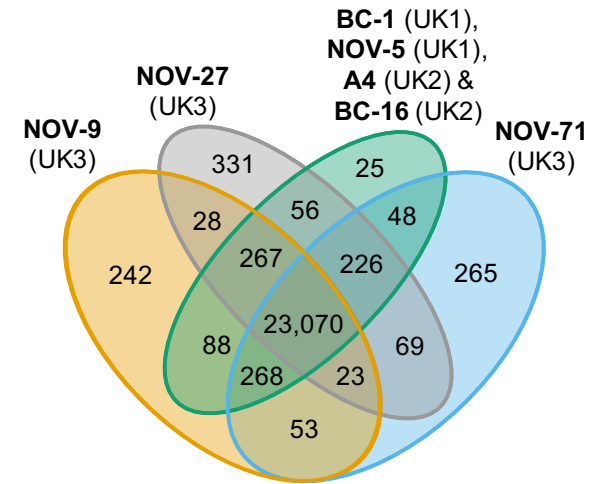

**BC-1 (UK1),  
NOV-5 (UK1),  
A4 (UK2) &  
BC-16 (UK2)**

877

878 **FIGURE 2 | Analysis of unique and expanded orthogroups for *Phytophthora fragariae* isolates of the UK1, UK2 and UK3 races did**  
 879 **not lead to the identification of candidate avirulence genes.** Orthology groups were identified by OrthoFinder (Emms and Kelly, 2015)  
 880 and Venn diagrams were plotted using the VennDiagram R package (Chen and Boutros, 2011) in R (R Core Team, 2016). **(A)** Analysis  
 881 focused on the *P. fragariae* isolates of race UK1: BC-1 and NOV-5 compared to isolates of races UK2 and UK3. **(B)** Analysis focused on  
 882 the *P. fragariae* isolates of race UK2: A4 and BC-16 compared to isolates of races UK1 and UK3. **(C)** Analysis focused on the *P. fragariae*  
 883 isolates of race UK3: NOV-5, NOV-27 and NOV-71 compared to isolates of races UK1 and UK2.

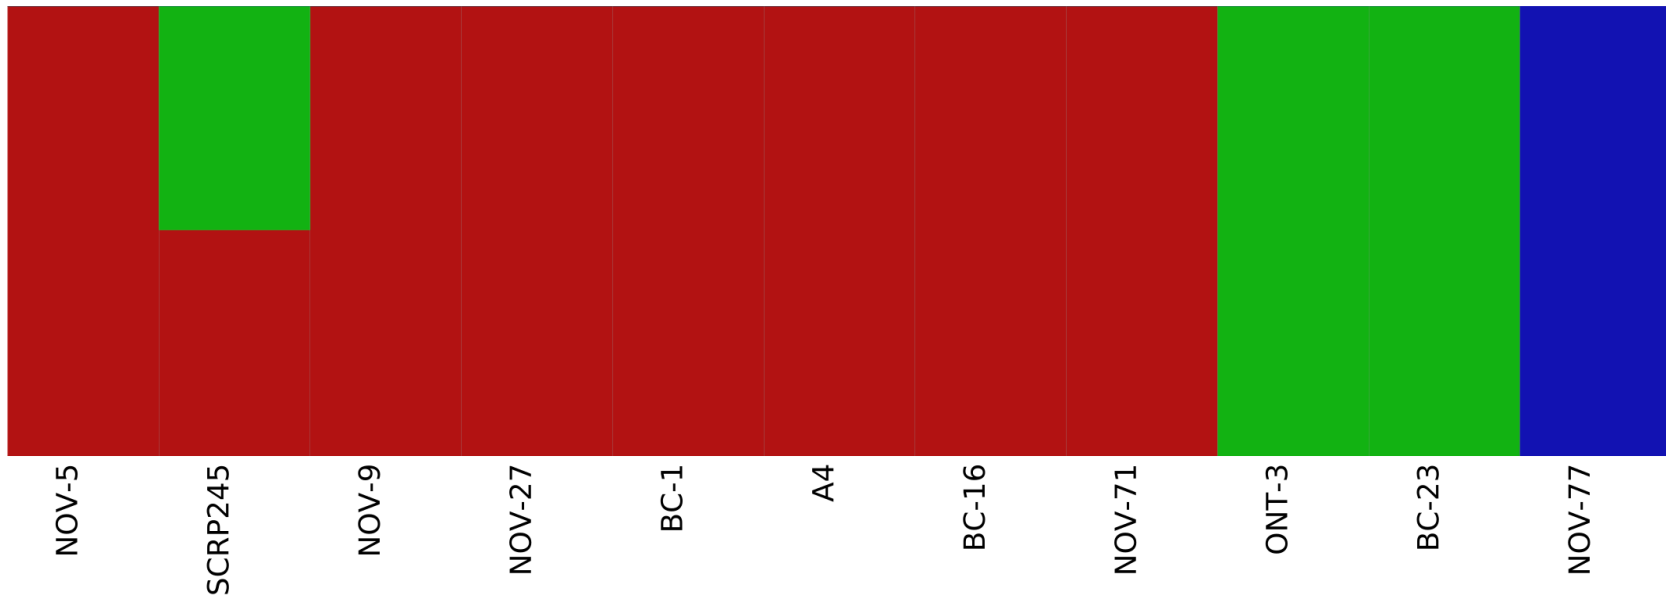

884

885 **FIGURE 3 | Analysis of high quality, biallelic SNP sites split the isolates into three populations with SCRP245, potentially forming**  
 886 **an ancestral or hybrid isolate between the UK1-2-3 population and the population represented by BC-23 and ONT-3.** Distruct plot  
 887 of fastSTRUCTURE (Raj et al., 2014) results carried out on all sequenced isolates of *Phytophthora fragariae*. Each colour represents a  
 888 different population. Variant sites were identified by aligning Illumina reads of all the sequenced isolates to the reference assembly of the  
 889 BC-16 isolate of *P. fragariae* with Bowtie 2 (Langmead and Salzberg, 2012) and analysis with the Genome Analysis Toolkit (GATK)  
 890 haplotypecaller (McKenna et al., 2010). Sites were filtered with VCFtools (Danecek et al., 2011) and VCFlib (Garrison, 2012) to leave only  
 891 high quality, biallelic SNP sites.

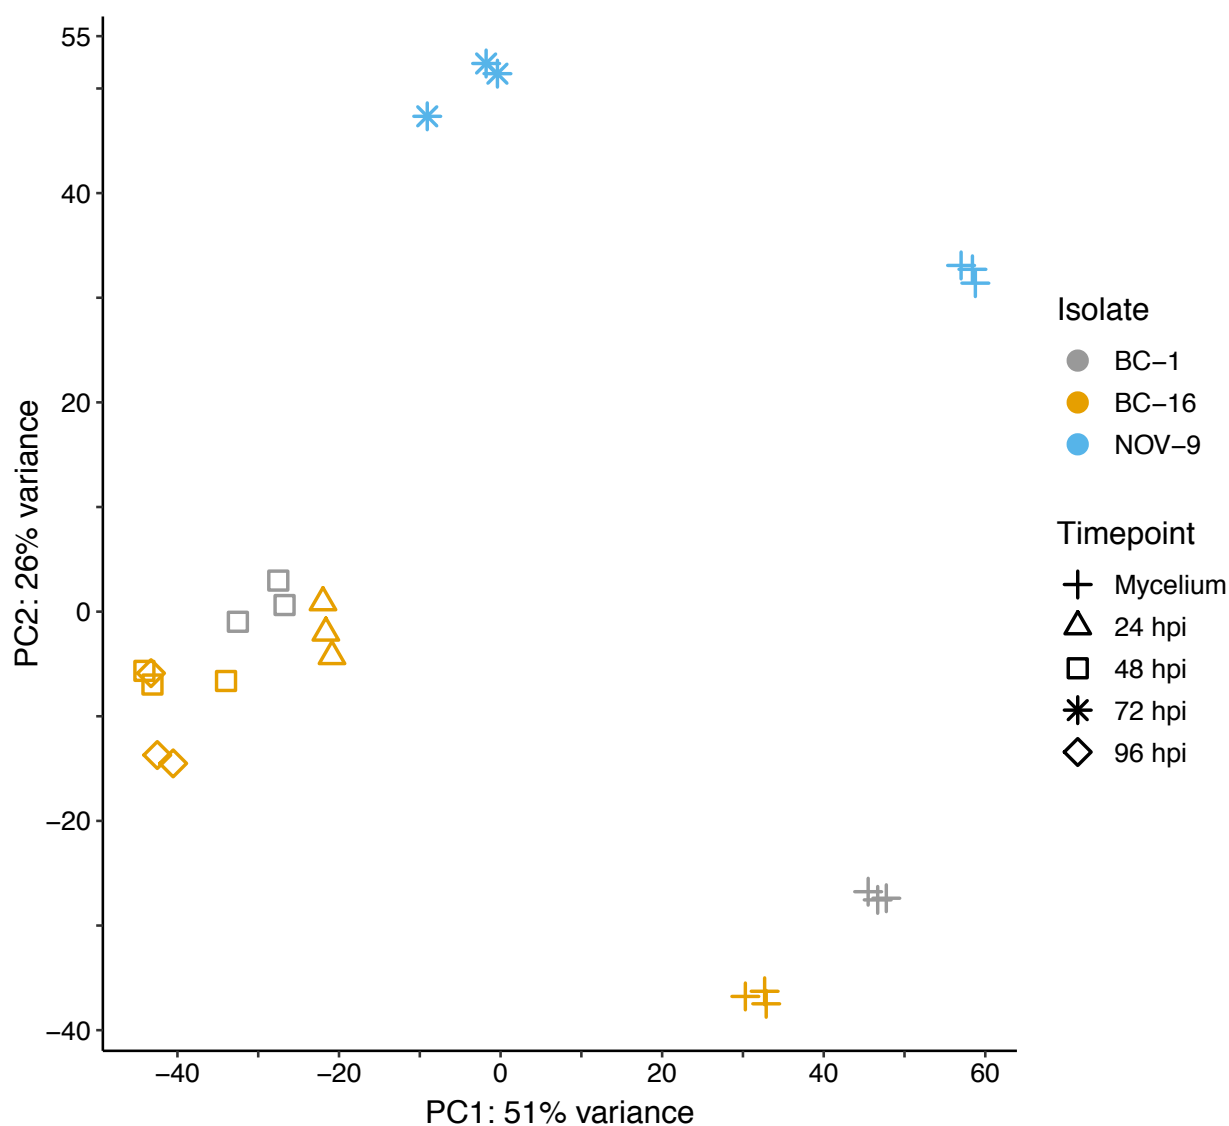

892

893 **FIGURE 4 | Principal component analysis of expression data showed biological replicates of**  
894 **each timepoint grouped together, with clear separation observed for the BC-16 timepoints.**

895 RNA-Seq reads were aligned to the assembly of the BC-16 isolate of *Phytophthora fragariae* using  
896 STAR version 2.5.3a (Dobin et al., 2013). Predicted transcripts were then quantified with  
897 featureCounts version 1.5.2 (Liao et al., 2014) and differential expression was identified with the  
898 DESeq2 version 1.10.1 R package (Love et al., 2014). Following this, an rlog transformation of the  
899 expression data was plotted as a principal component analysis with R (R Core Team, 2016).



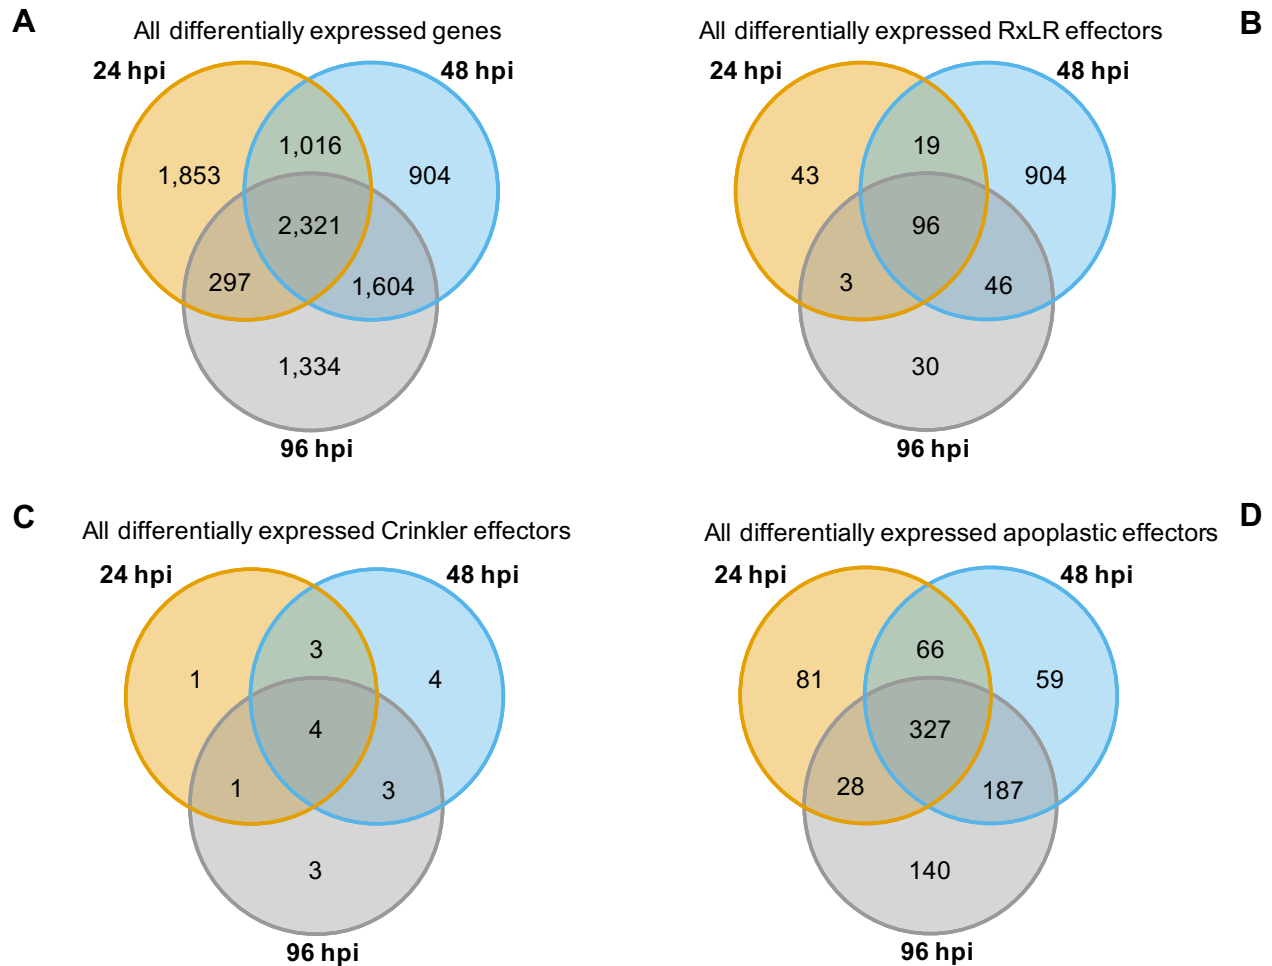

900

901 **FIGURE 5 | *In planta* RNA-Seq dataset captured changes during the progress of infection in the**  
902 ***Phytophthora fragariae* BC-16 isolate.** RNA-Seq reads were aligned to the assembly of the BC-16  
903 isolate of *P. fragariae* using STAR (Dobin et al., 2013). Predicted transcripts were then quantified  
904 with featureCounts (Liao et al., 2014) and differential expression was identified with DESeq2 (Love  
905 et al., 2014). Following this, Venn diagrams were plotted using the VennDiagram R package (Chen  
906 and Boutros, 2011) in R (R Core Team, 2016). **(A)** All differentially expressed genes. **(B)** All  
907 differentially expressed RxLR effectors. **(C)** All differentially expressed Crinkler effectors. **(D)** All  
908 differentially expressed putative apoplastic effectors.

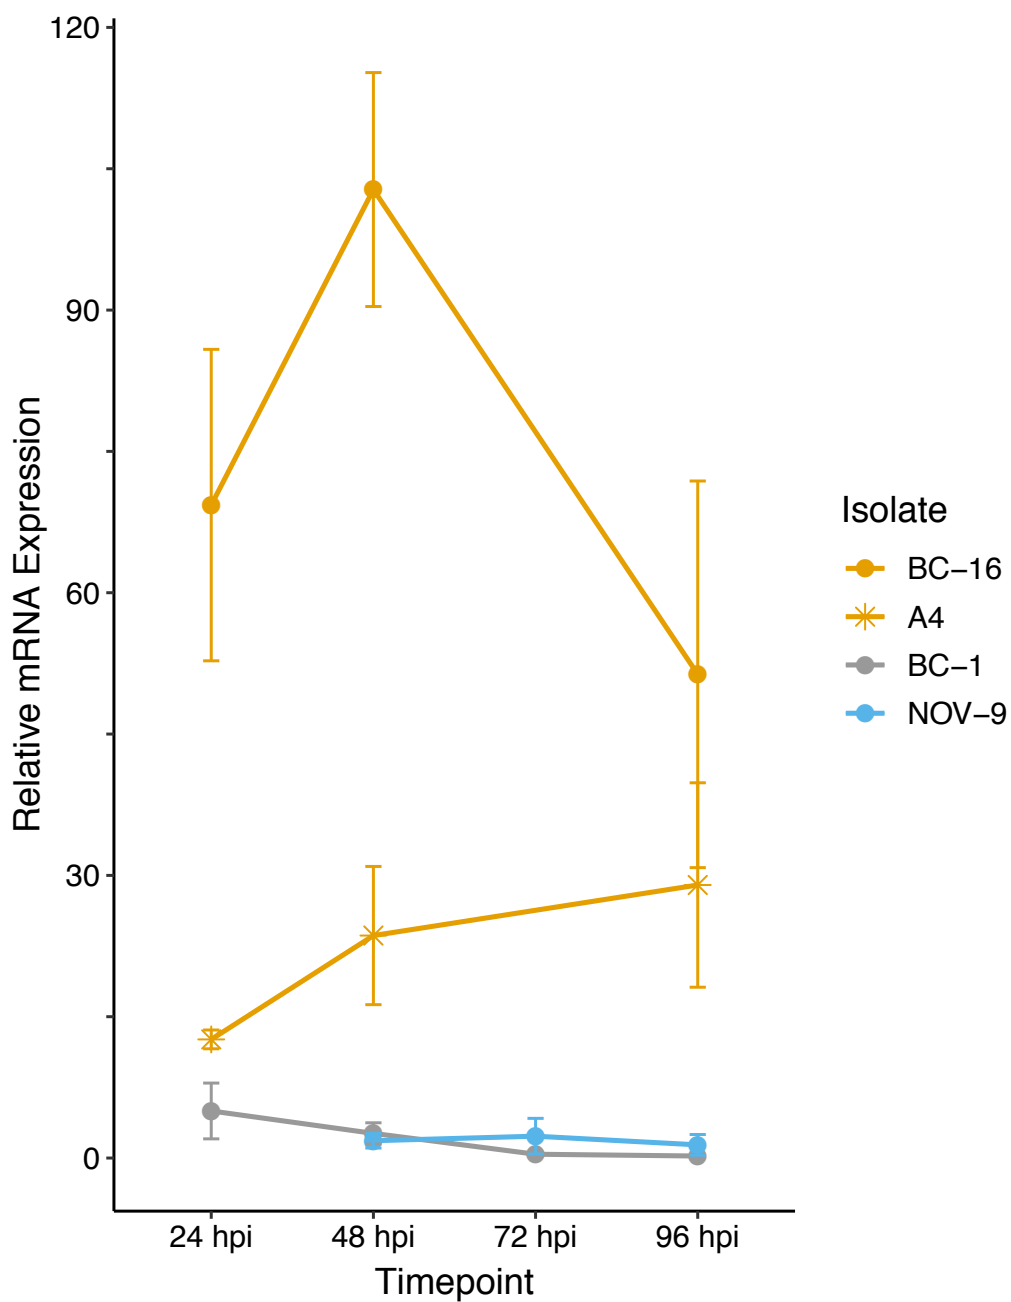

909

910 **FIGURE 6 | *PfAvr2* candidate PF003\_g27513 is differentially expressed in *Phytophthora***  
911 ***fragariae* UK-1-2-3 isolates.** Quantitative reverse transcription PCR of a strong candidate for the  
912 avirulence gene possessed by BC-16 and A4, but not BC-1 and NOV-9 (PF003\_g27513.t1). Plots  
913 created by the ggplot2 R package (Wickham, 2016) in R version 3.4.3 (R core team, 2017).

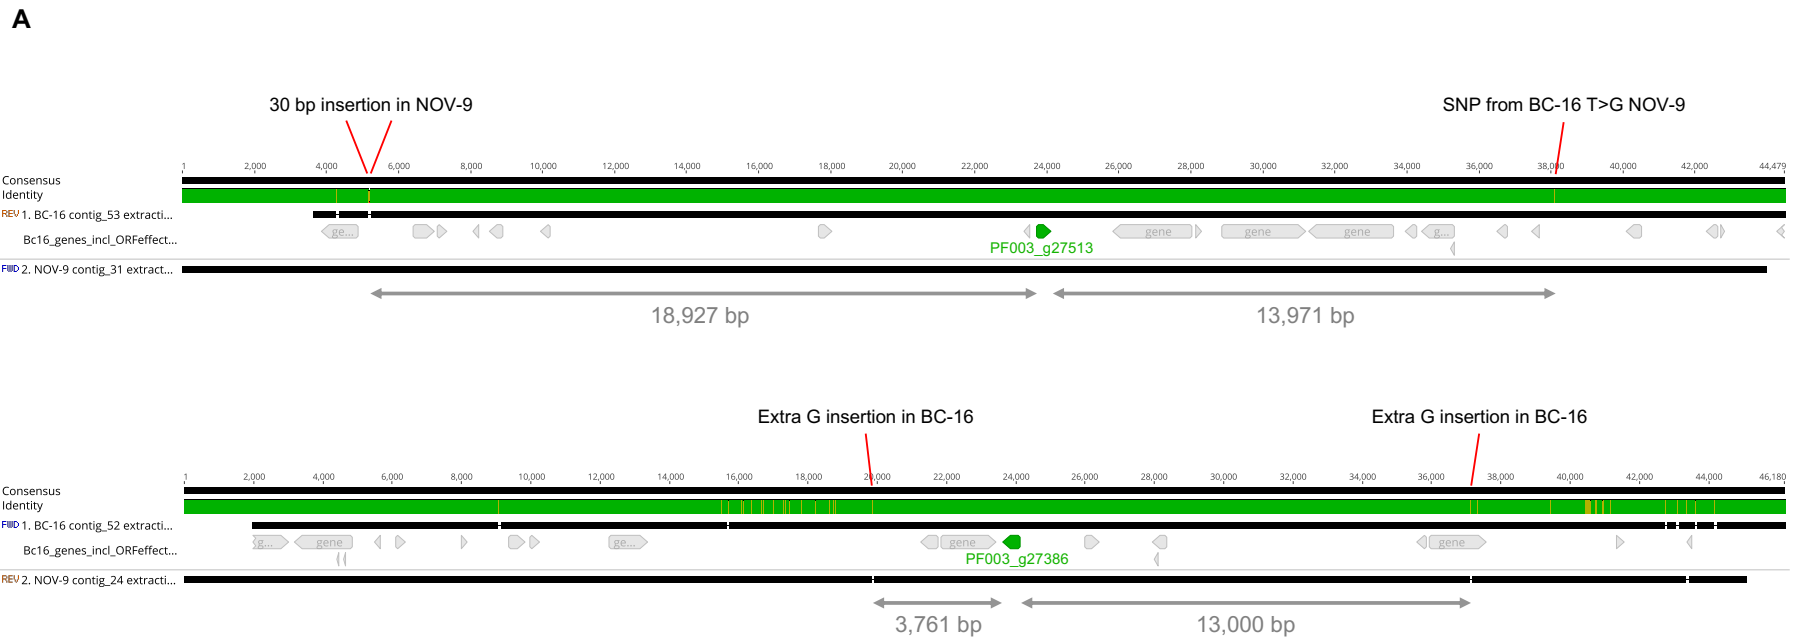

**B**

914

915 **FIGURE 7 | Differential expression of putative *PfAvr2* and *PfAvr3* is not due to sequence variation in *Phytophthora fragariae* BC-**

916 **16 (UK2) and NOV-9 (UK3) genomes.** Regions surrounding candidate avirulence genes, *PfAvr2* and *PfAvr3*, from BC-16 and NOV-9

917 aligned with MAFFT in Geneious R10 (Kato et al., 2002; Kato and Standley, 2013). **(A)** Putative *PfAvr2*, showing a 30 bp insertion in

918 the NOV-9 sequence upstream of PF003\_g27513 and a T to G SNP in NOV-9 downstream of the gene of interest. **(B)** Putative *PfAvr3*,

919 showing an extra G insertion in BC-16 upstream of PF003\_g27386 (an orthologue of PF009\_g26267) and an extra G insertion in BC-16

920 3,761 bp downstream.

## TABLES

**TABLE 1 | Summary of *Phytophthora fragariae* and *Phytophthora rubi* isolates used in this study.**

| Isolate Name | Species                       | Location                                                                      | Date Isolated | Isolated by     | Pathogenicity Race |
|--------------|-------------------------------|-------------------------------------------------------------------------------|---------------|-----------------|--------------------|
| A4           | <i>Phytophthora fragariae</i> | Unknown                                                                       | 17/12/2001    | Unknown         | US4                |
| BC-1         | <i>Phytophthora fragariae</i> | Commercial Strawberry Field, Delta, BC, Canada                                | 05/01/2007    | N. L. Nickerson | CA1 (UK1)          |
| BC-16        | <i>Phytophthora fragariae</i> | Commercial Strawberry Field, Ladner, BC, Canada                               | 05/01/2007    | N. L. Nickerson | CA3 (UK2)          |
| BC-23        | <i>Phytophthora fragariae</i> | Commercial Strawberry Field, Aldergrove, BC, Canada                           | 30/01/2012    | N. L. Nickerson | CA5                |
| NOV-5        | <i>Phytophthora fragariae</i> | Commercial Strawberry Field, Nine Mile River, Hants County, NS, Canada        | 17/12/2001    | N. L. Nickerson | CA1                |
| NOV-9        | <i>Phytophthora fragariae</i> | Commercial Strawberry Field, Billtown, Kings County, NS, Canada               | 05/01/2007    | N. L. Nickerson | CA2 (UK3)          |
| NOV-27       | <i>Phytophthora fragariae</i> | Commercial Strawberry Field, Cambridge Station, Kings County, NS, Canada      | 19/12/2001    | N. L. Nickerson | CA2                |
| NOV-71       | <i>Phytophthora fragariae</i> | Commercial Strawberry Field, Middle Clyde River, Shelburne County, NS, Canada | 05/01/2007    | N. L. Nickerson | CA2                |
| NOV-77       | <i>Phytophthora fragariae</i> | Commercial Strawberry Field, Nine Mile River, Hants County, NS, Canada        | 30/01/2012    | N. L. Nickerson | CA5                |
| ONT-3        | <i>Phytophthora fragariae</i> | Commercial Strawberry Field, Fort Erie, ON, Canada                            | 05/01/2007    | N. L. Nickerson | CA4                |
| SCR245       | <i>Phytophthora fragariae</i> | Kent, England, UK                                                             | 1945          | Unknown         | Unknown            |
| SCR249       | <i>Phytophthora rubi</i>      | Germany                                                                       | 1985          | Unknown         | 1                  |
| SCR324       | <i>Phytophthora rubi</i>      | Scotland, UK                                                                  | 1991          | Unknown         | 1                  |
| SCR333       | <i>Phytophthora rubi</i>      | Scotland, UK                                                                  | 1985          | Unknown         | 3                  |

**TABLE 2 | *Phytophthora fragariae* race structure detected by three differential strawberry (*Fragaria* × *ananassa*) accessions and categorisation into UK race scheme.**

| Cultivar <sup>a</sup>            | Mock               | <i>Phytophthora fragariae</i> Isolate <sup>b</sup> |                    |                    |                  |                  |                  |                  |
|----------------------------------|--------------------|----------------------------------------------------|--------------------|--------------------|------------------|------------------|------------------|------------------|
|                                  |                    | BC-1                                               | BC-16              | NOV-9              | A4               | NOV-27           | NOV-5            | NOV-71           |
| Allstar <sub>1, 2, 3</sub>       | 0 <sup>4/4</sup>   | 0 <sup>8/8</sup>                                   | 0 <sup>7/7</sup>   | 0 <sup>4/4</sup>   | 0 <sup>3/4</sup> | 0 <sup>2/3</sup> | 0 <sup>3/3</sup> | 0 <sup>4/5</sup> |
| Cambridge Vigour <sub>2, 3</sub> | 0 <sup>5/5</sup>   | + <sup>7/9</sup>                                   | 0 <sup>5/5</sup>   | 0 <sup>8/8</sup>   | 0 <sup>5/5</sup> | 0 <sup>4/5</sup> | + <sup>5/5</sup> | 0 <sup>4/5</sup> |
| Hapil                            | 0 <sup>12/12</sup> | + <sup>10/10</sup>                                 | + <sup>10/10</sup> | + <sup>10/10</sup> | + <sup>4/5</sup> | + <sup>5/5</sup> | + <sup>3/5</sup> | + <sup>5/5</sup> |
| Redgauntlet <sub>2</sub>         | 0 <sup>12/12</sup> | + <sup>7/10</sup>                                  | 0 <sup>9/10</sup>  | + <sup>9/10</sup>  | 0 <sup>5/5</sup> | + <sup>5/5</sup> | + <sup>5/5</sup> | + <sup>5/5</sup> |
| Deduced UK race                  | N/A                | Race 1                                             | Race 2             | Race 3             | Race 2           | Race 3           | Race 1           | Race 3           |

<sup>a</sup> Known resistance genes in the *Fragaria* × *ananassa* cultivars.

<sup>b</sup> Number of replicates showing the recorded phenotype compared to the number of replicates tested; “+” representing a successful infection and “0” representing resistance.

**TABLE 3 | Long read PacBio sequencing generated a highly contiguous *Phytophthora fragariae* BC-16 (UK2) reference genome.** Assembly and annotation statistics compared to *Phytophthora sojae* P6497 (Tyler et al., 2006). Values in brackets include low confidence gene models from open reading frames.

|                      | <b><i>Phytophthora fragariae</i><br/>BC-16</b> | <b><i>Phytophthora sojae</i><br/>P6497</b> |
|----------------------|------------------------------------------------|--------------------------------------------|
| Assembly size (Mb)   | 90.97                                          | 82.60                                      |
| Number of contigs    | 180                                            | 862                                        |
| N50 (kb)             | 923.5                                          | 386.0                                      |
| L50                  | 33                                             | 61                                         |
| Repeatmasked         | 38%                                            | 29%                                        |
| Genes                | 37,049 (41,103)                                | 26,584                                     |
| RxLRs                | 486 (1,052)                                    | 350                                        |
| CRNs                 | 82 (85)                                        | 40                                         |
| Apoplastic effectors | 1,274 (4,757)                                  | N/A                                        |

**TABLE 4 | Comparable assembly statistics and gene predictions in resequenced isolates of *Phytophthora fragariae* and *Phytophthora rubi*.**

|                                | <i>Phytophthora fragariae</i> |                    |                    |                    |                    |                    |                    |                    |                    |                    | <i>Phytophthora rubi</i> |                    |                    |                    |
|--------------------------------|-------------------------------|--------------------|--------------------|--------------------|--------------------|--------------------|--------------------|--------------------|--------------------|--------------------|--------------------------|--------------------|--------------------|--------------------|
|                                | A4                            | BC-1               | BC-16              | BC-23              | NOV-5              | NOV-9              | NOV-27             | NOV-71             | NOV-77             | ONT-3              | SCR245                   | SCR249             | SCR324             | SCR333             |
| Assembly Size (Mb)             | 79.08                         | 79.10              | 90.97              | 78.26              | 78.99              | 79.43              | 79.75              | 78.37              | 78.80              | 79.06              | 77.84                    | 77.79              | 77.91              | 77.82              |
| Contig Number ( $\geq$ 500 bp) | 13,446                        | 11,556             | 180                | 13,191             | 13,531             | 11,801             | 12,489             | 12,212             | 13,321             | 13,265             | 13,231                   | 14,023             | 13,946             | 13,679             |
| N50 (kb)                       | 18.2                          | 21.8               | 923.5              | 18.2               | 17.9               | 21.5               | 19.4               | 20.2               | 18.9               | 18.8               | 18.2                     | 16.6               | 16.9               | 16.9               |
| L50                            | 1,116                         | 953                | 33                 | 1,119              | 1,134              | 978                | 1,046              | 1,016              | 1,101              | 1,104              | 1,120                    | 1,232              | 1,218              | 1,210              |
| Repeatmasked                   | 31%                           | 31%                | 38%                | 31%                | 31%                | 31%                | 31%                | 31%                | 31%                | 31%                | 31%                      | 31%                | 31%                | 30%                |
| Genes <sup>a</sup>             | 30,180<br>(33,623)            | 30,375<br>(33,691) | 37,049<br>(41,103) | 29,960<br>(33,143) | 30,248<br>(33,699) | 29,986<br>(33,527) | 30,600<br>(33,797) | 29,708<br>(33,143) | 30,099<br>(33,580) | 30,180<br>(33,415) | 30,202<br>(33,223)       | 31,458<br>(34,139) | 30,235<br>(33,263) | 32,623<br>(35,223) |
| Single-Copy BUSCO genes        | 274<br>(90%)                  | 274<br>(90%)       | 266<br>(88%)       | 275<br>(91%)       | 273<br>(90%)       | 273<br>(90%)       | 273<br>(90%)       | 274<br>(90%)       | 272<br>(90%)       | 277<br>(91%)       | 273<br>(90%)             | 273<br>(90%)       | 274<br>(90%)       | 275<br>(91%)       |
| Duplicated BUSCO genes         | 6 (2%)                        | 6 (2%)             | 9 (3%)             | 5 (2%)             | 7 (2%)             | 6 (2%)             | 6 (2%)             | 6 (2%)             | 8 (2.5%)           | 7 (2%)             | 7 (2.5%)                 | 8 (3%)             | 8 (3%)             | 7 (2%)             |
| Fragmented BUSCO genes         | 6 (2%)                        | 6 (2%)             | 5 (1.5%)           | 7 (2%)             | 6 (2%)             | 7 (2%)             | 7 (2%)             | 6 (2%)             | 6 (2%)             | 4 (1%)             | 7 (2.5%)                 | 3 (1%)             | 3 (1%)             | 3 (1%)             |
| Missing BUSCO genes            | 17 (6%)                       | 17 (6%)            | 23 (7.5%)          | 16 (5%)            | 17 (6%)            | 17 (6%)            | 17 (6%)            | 17 (6%)            | 17 (5.5%)          | 15 (5%)            | 16 (5%)                  | 19 (6%)            | 18 (6%)            | 18 (6%)            |

<sup>a</sup> Values in brackets include low confidence gene models from open reading frames.

**TABLE 5 | Effector gene predictions in resequenced isolates of *Phytophthora fragariae* and *Phytophthora rubi*.**

|                                    | <i>Phytophthora fragariae</i> |                  |                  |                |                |                  |                  | <i>Phytophthora rubi</i> |                  |                |                |                  |                  |                  |
|------------------------------------|-------------------------------|------------------|------------------|----------------|----------------|------------------|------------------|--------------------------|------------------|----------------|----------------|------------------|------------------|------------------|
|                                    | A4                            | BC-1             | BC-16            | BC-23          | NOV-5          | NOV-9            | NOV-27           | NOV-71                   | NOV-77           | ONT-3          | SCR245         | SCR249           | SCR324           | SCR333           |
| Secreted proteins <sup>a</sup>     | 3,637                         | 3,601            | 4,217            | 3,611          | 3,626          | 3,637            | 3,690            | 3,633                    | 3,620            | 3,658          | 3,581          | 3,697            | 3,683            | 3,832            |
| RxLR HMM <sup>b</sup>              | 194                           | 194              | 218              | 188            | 196            | 186              | 183              | 191                      | 166              | 191            | 196            | 197              | 195              | 207              |
| RxLR-EER Regex <sup>c</sup>        | 178                           | 184              | 208              | 176            | 186            | 174              | 172              | 182                      | 150              | 178            | 185            | 188              | 176              | 188              |
| RxLR Regex                         | 371                           | 367              | 445              | 364            | 370            | 356              | 369              | 374                      | 341              | 367            | 370            | 363              | 350              | 359              |
| Final RxLR effectors <sup>d</sup>  | 410<br>(935)                  | 405<br>(919)     | 486<br>(1,052)   | 402<br>(928)   | 408<br>(918)   | 397<br>(951)     | 405<br>(899)     | 412<br>(931)             | 378<br>(934)     | 403<br>(898)   | 407<br>(882)   | 407<br>(882)     | 395<br>(861)     | 410<br>(826)     |
| CRN LFLAK HMM <sup>c</sup>         | 85                            | 83               | 114              | 86             | 84             | 82               | 87               | 90                       | 86               | 90             | 90             | 156              | 93               | 154              |
| CRN DWL HMM <sup>c</sup>           | 95                            | 87               | 121              | 96             | 91             | 96               | 93               | 101                      | 83               | 90             | 87             | 139              | 102              | 142              |
| Final CRNs <sup>d,e</sup>          | 55<br>(68)                    | 53<br>(59)       | 82<br>(87)       | 55<br>(62)     | 53<br>(67)     | 50<br>(61)       | 57<br>(63)       | 59<br>(71)               | 62<br>(75)       | 61<br>(74)     | 60<br>(68)     | 128<br>(132)     | 71<br>(85)       | 128<br>(134)     |
| Apoplatic effectors <sup>d,f</sup> | 991<br>(3,896)                | 1,002<br>(3,798) | 1,274<br>(4,757) | 980<br>(3,630) | 986<br>(3,913) | 1,007<br>(3,983) | 1,011<br>(3,708) | 1,007<br>(3,911)         | 1,010<br>(3,922) | 982<br>(3,709) | 984<br>(3,522) | 1,017<br>(3,266) | 1,059<br>(3,607) | 1,090<br>(3,268) |

<sup>a</sup> SignalP: Nielsen et al., 1997; Bendtsen et al., 2004; Petersen et al., 2011 and Phobius: Käll et al., 2007.

<sup>b</sup> Whisson et al., 2007.

<sup>c</sup> Armitage et al., 2018.

<sup>d</sup> Values in brackets include low confidence gene models from open reading frames.

<sup>e</sup> Both LFLAK and DWL HMM models present (Armitage et al., 2018).

<sup>f</sup> ApoplastP: Spersneider et al., 2018.



**TABLE 6 | Conserved putative core *Phytophthora fragariae* RxLR effector candidates important for pathogenicity on strawberry (*Fragaria* × *ananassa*) from isolates BC-1, BC-16 and NOV-9.** Conserved RxLR candidates in the 50 highest expressed genes *in planta* with a log fold change (LFC) of  $\geq 3$ , based on comparison to respective mycelium. The BC-16 24 hour post inoculation (hpi) timepoint was used for BC-16.

| Orthogroup | BC-16 gene ID | Fragments Per Kilobase of transcript per Million mapped reads (FPKM) |        |             |        |        |        |             |        | Avr homology                       |
|------------|---------------|----------------------------------------------------------------------|--------|-------------|--------|--------|--------|-------------|--------|------------------------------------|
|            |               | BC-1 (UK1)                                                           |        | BC-16 (UK2) |        |        |        | NOV-9 (UK3) |        |                                    |
|            |               | Mycelium                                                             | 48 hpi | Mycelium    | 24 hpi | 48 hpi | 96 hpi | Mycelium    | 72 hpi |                                    |
| OG0010423  | PF003_g35418  | 94                                                                   | 5,354  | 192         | 6,578  | 4,986  | 2,961  | 12          | 3,868  |                                    |
| OG0018019  | PF003_g6480   | 241                                                                  | 3,544  | 235         | 2,113  | 1,977  | 1,717  | 231         | 2,501  |                                    |
| OG0011458  | PF003_g16448  | 4                                                                    | 2,899  | 4           | 4,656  | 2,108  | 1,090  | 7           | 1,699  | <i>P. sojae Avr1b</i> <sup>a</sup> |
| OG0021012  | PF003_g16234  | 36                                                                   | 1,345  | 31          | 1,181  | 827    | 674    | 23          | 737    |                                    |

<sup>a</sup> Top hit from GenBank tblastn search is AF449623, *Phytophthora sojae Avr1b* (Shan et al., 2004).

921 **SUPPLEMENTARY MATERIAL**

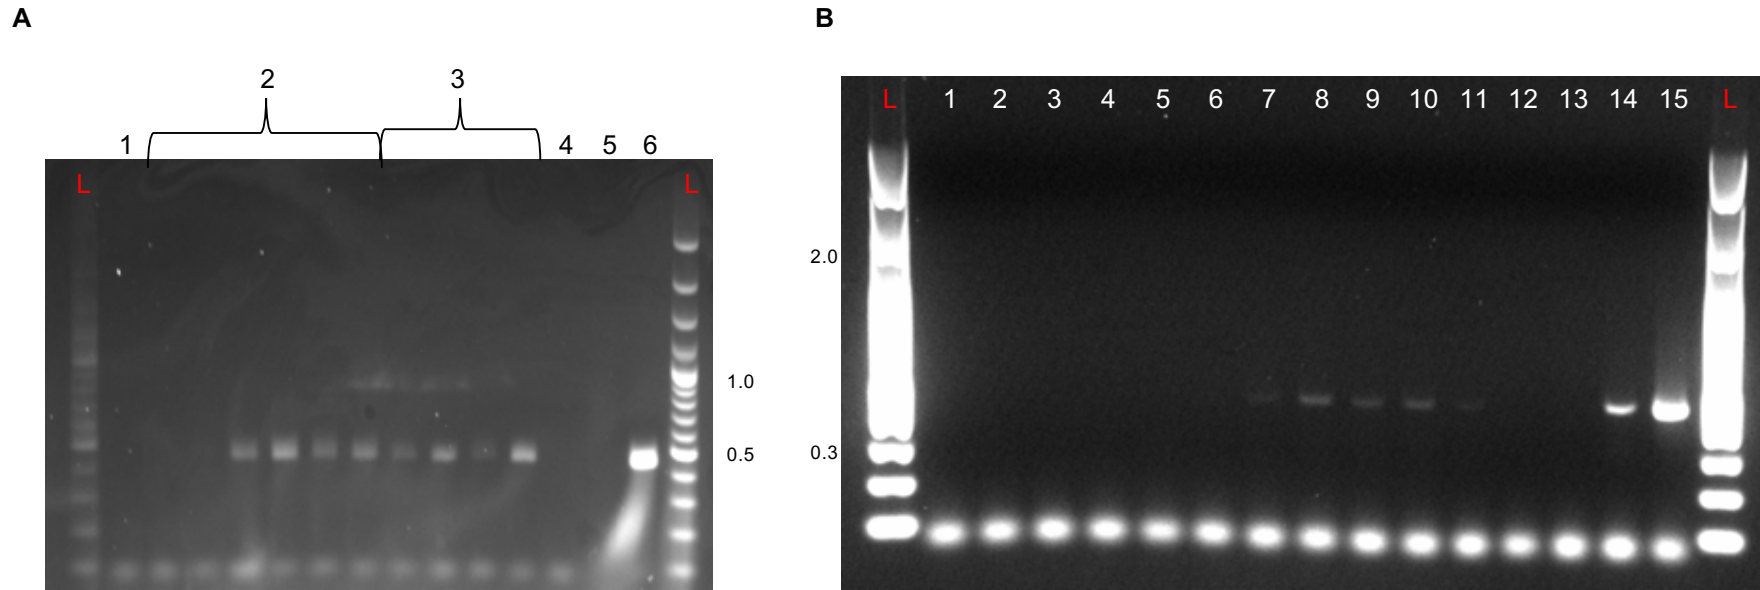

922  
 923 **SUPPLEMENTARY FIGURE S1 | Agarose gel electrophoresis of RT-PCR reactions on representative samples from inoculation**  
 924 **time course experiments on the ‘Hapil’ cultivar of *Fragaria × ananassa*. A:** Gel of samples from an inoculation time course experiment  
 925 with the BC-16 isolate of *Phytophthora fragariae*. **L:** 100 bp Plus Ladder (ThermoFisher Scientific, Waltham, MA, USA) sizes listed in  
 926 kb. **1:** Mock inoculated *Fragaria × ananassa* cultivar 'Hapil' plant. **2:** Time course of inoculated plants with stream water used as the  
 927 flooding solution. Time points from left to right: 24 hpi, 48 hpi, 96 hpi, 144 hpi, 192 hpi and 240 hpi. **3:** Time course of inoculated plants  
 928 with Petri’s solution used as the flooding solution. Time points from left to right: 24 hpi, 48 hpi, 96 hpi and 144 hpi. **4:** dH2O control. **5:**  
 929 ‘Flamenco’ gDNA control. **6:** BC-16 gDNA control. **B:** Gel of samples from an inoculation time course experiment with the BC-1 and  
 930 NOV-9 isolates of *P. fragariae*. **L:** 100 bp plus ladder from New England Biolabs, sizes listed in kb. PCR templates: **1:** Uninoculated plant  
 931 cDNA. **2:** NOV-9 12 hours post inoculation (hpi) cDNA. **3:** BC-1 12 hpi cDNA. **4:** NOV-9 24 hpi cDNA. **5:** BC-1 24 hpi cDNA. **6:** NOV-  
 932 9 48 hpi cDNA. **7:** BC-1 48 hpi cDNA. **8:** NOV-9 72 hpi cDNA. **9:** BC-1 72 hpi cDNA. **10:** NOV-9 96 hpi cDNA. **11:** BC-1 96 hpi cDNA.  
 933 **12:** dH2O. **13:** gDNA from a *F. × ananassa* cultivar ‘Hapil’ plant. **14:** gDNA from BC-16 mycelium. **15:** cDNA from BC-16 mycelium.

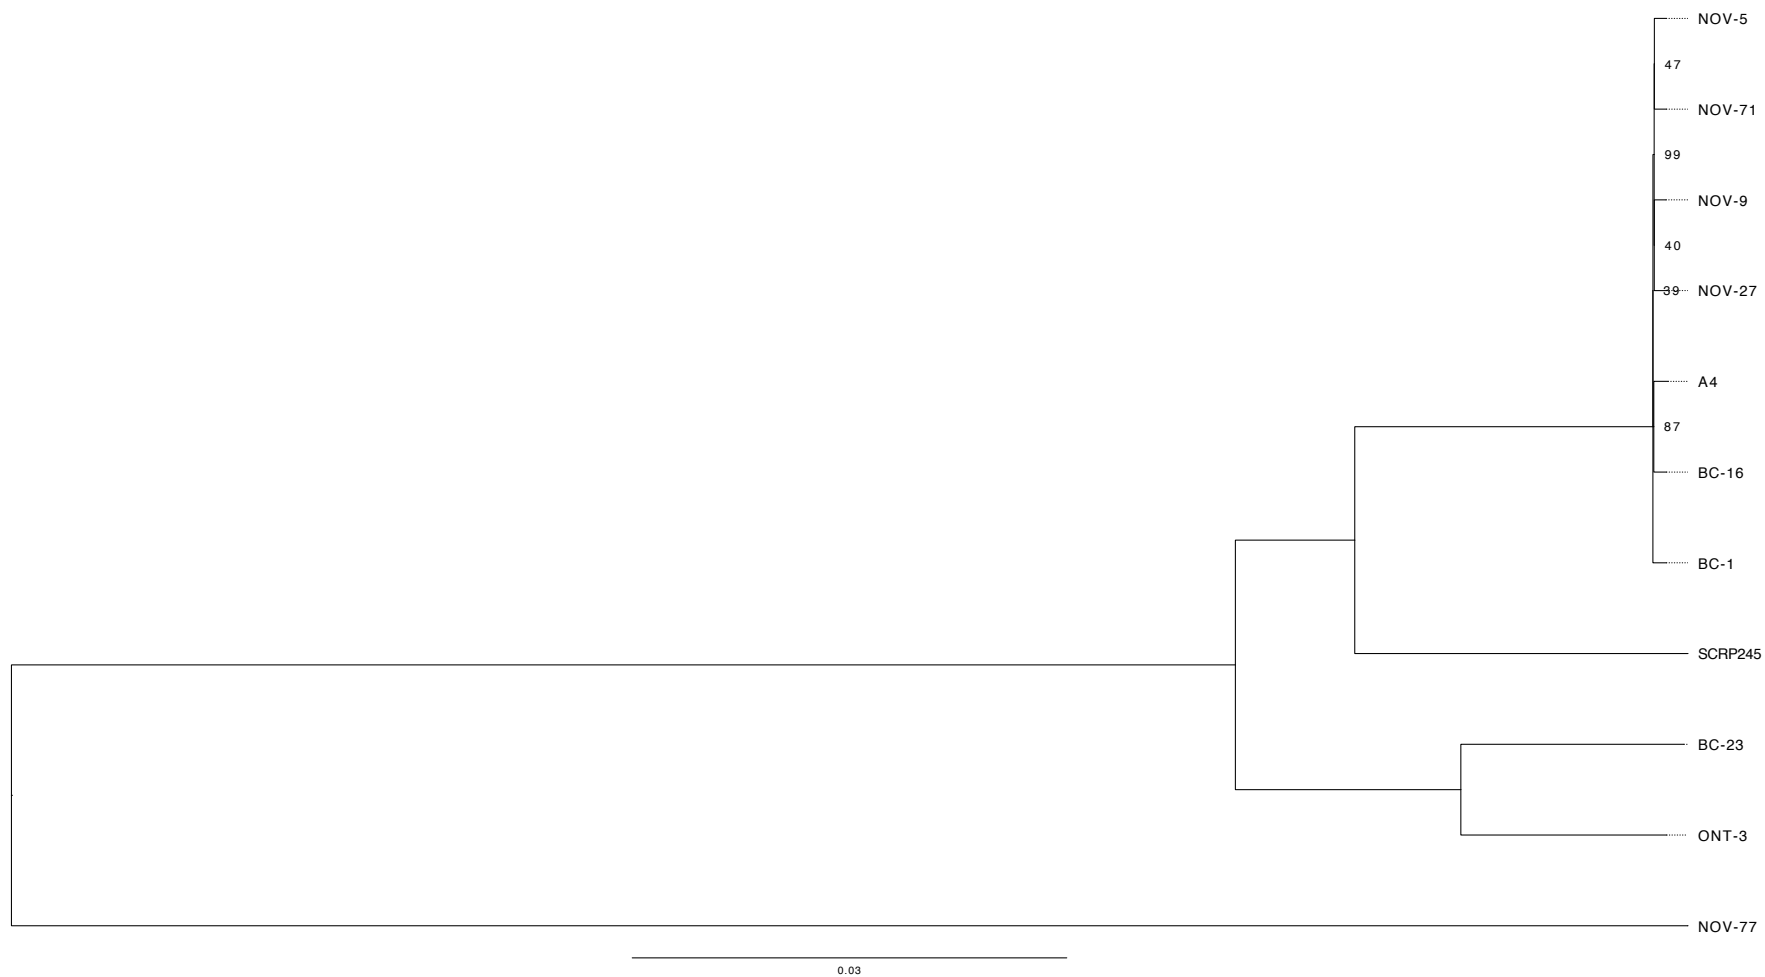

934

935 **SUPPLEMENTARY FIGURE S2 | *Phytophthora fragariae* isolates separate into distinct clades.** Neighbour joining tree based on high  
 936 quality, biallelic SNP sites, node labels represent the number of bootstrap replicates supporting the node; only values less than 100 are  
 937 shown.

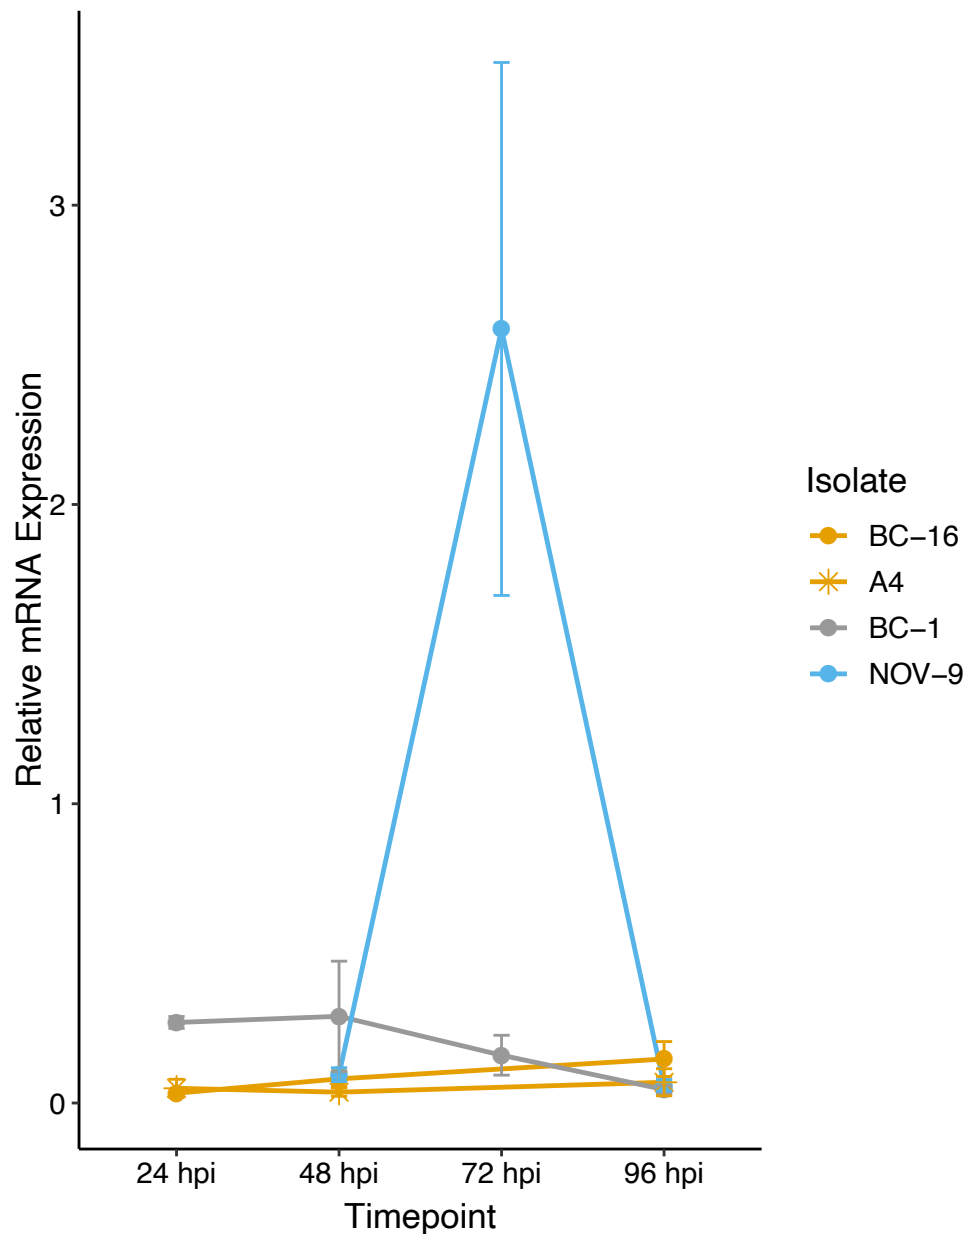

938

939 **SUPPLEMENTARY FIGURE S3 | *PfAvr3* candidate PF009\_g26276 is differentially expressed**  
940 **in *Phytophthora fragariae* UK-1-2-3 isolates.** Quantitative reverse transcription PCR of a candidate  
941 for the avirulence gene possessed by NOV-9, but not BC-1, BC-16 and A4 (PF009\_g26276.t1). Plots  
942 created by the ggplot2 R package (Wickham, 2016) in R version 3.4.3 (R core team, 2017).

**SUPPLEMENTARY TABLES**

**SUPPLEMENTARY TABLE S1 | Primers used in this study.** Primers supplied by IDT (Leuven, Belgium).

| <b>Primer Name</b> | <b>Target</b>             | <b>Gene Name</b>        | <b>BC-16 Gene ID</b> | <b>Primer Sequence</b>         | <b>Length (bp)</b> | <b>Reference</b>      |
|--------------------|---------------------------|-------------------------|----------------------|--------------------------------|--------------------|-----------------------|
| Pf_Btub_F          | RT-PCR                    | $\beta$ -tubulin        | PF003_g4288.t1       | 5'-GGATAACGAGGCCCTGTACG-3'     | 440                | This Study            |
| Pf_Btub_R          |                           |                         |                      | 5'-TGTTGTTGGGGATCCACTCG-3'     |                    |                       |
| WS41_163F          | Housekeeping              | WS41                    | PF003_g28439.t1      | 5'-ATCGTGCTGTACCTGGGC-3'       | 156                | This Study            |
| WS41_318R          |                           |                         |                      | 5'-GATCTCGCTGGGCTTGAAGG-3'     |                    |                       |
| Btub_44F           | Housekeeping              | $\beta$ -tubulin        | PF003_g4288.t1       | 5'-CCGCGCCCGTACAGCAAC-3'       | 109                | This Study            |
| Btub_152R          |                           |                         |                      | 5'-TCGGAGATGACTTCCCAGAACTTG-3' |                    |                       |
| cAvr2_65F          | Candidate Race 2 Avr Gene | Candidate <i>PfAvr2</i> | PF003_g27513.t1      | 5'-TGTCAAAGGCCGATCAGAGC-3'     | 180                | This Study            |
| cAvr2_244R         |                           |                         |                      | 5'-CGAACAAACTATCCACACCAGC-3'   |                    |                       |
| cAvr3_F            | Candidate Race 3 Avr Gene | Candidate <i>PfAvr3</i> | PF003_g27386.t1      | 5'-ACAAGATGGACCCGAACCTCAT-3'   | 209                | This Study            |
| cAvr3_R            |                           |                         |                      | 5'-CAACCTCCTGACAGCTCCTTCAAC-3' |                    |                       |
| U16SRT-F           | Inter-plate calibrator    | 16S                     | N/A                  | 5'-ACTCCTACGGGAGGCAGCAGT-3'    | 180                | Clifford et al., 2012 |
| U16SRT-R           |                           |                         |                      | 5'-TATTACCGCGGCTGCTGGC-3'      |                    |                       |

**SUPPLEMENTARY TABLE S2 | Details of expression of genes surrounding putative *PfAvr2* (PF003\_g27513).**

| Orthogroup                    | BC-16 gene ID    | Fragments Per Kilobase of transcript per Million mapped reads (FPKM) |          |          |          |              |              |              |          |           |
|-------------------------------|------------------|----------------------------------------------------------------------|----------|----------|----------|--------------|--------------|--------------|----------|-----------|
|                               |                  | BC-1                                                                 |          | BC-16    |          |              |              | NOV-9        |          |           |
|                               |                  | Mycelium                                                             | 48 hpi   | Mycelium | 24 hpi   | 48 hpi       | 96 hpi       | Mycelium     | 72 hpi   |           |
| OG0003811                     | PF003_g27515     | 0                                                                    | 0        | 0        | 0        | 0            | 0            | 0            | 0        |           |
| OG0000375                     | PF003_g27514     | 476                                                                  | 546      | 11       | 248      | 260          | 206          | 58           | 80       |           |
| <b>Putative <i>PfAvr2</i></b> | <b>OG0026610</b> | <b>PF003_g27513</b>                                                  | <b>0</b> | <b>0</b> | <b>1</b> | <b>9,392</b> | <b>6,263</b> | <b>3,075</b> | <b>0</b> | <b>33</b> |
| OG0000960                     | PF003_g27512     | 3                                                                    | 1        | 0        | 0        | 0            | 1            | 2            | 2        |           |
| OG0036362                     | PF003_g27511     | 0                                                                    | 0        | 0        | 0        | 0            | 0            | --           | --       |           |

**SUPPLEMENTARY TABLE S3 | Details of expression of genes surrounding putative *PfAvr3* (PF003\_g27386/PF009\_g26276).**

| Orthogroup                    | BC-16 gene ID    | Fragments Per Kilobase of transcript per Million mapped reads (FPKM) |           |          |           |           |          |          |           |            |
|-------------------------------|------------------|----------------------------------------------------------------------|-----------|----------|-----------|-----------|----------|----------|-----------|------------|
|                               |                  | BC-1                                                                 |           | BC-16    |           |           |          | NOV-9    |           |            |
|                               |                  | Mycelium                                                             | 48 hpi    | Mycelium | 24 hpi    | 48 hpi    | 96 hpi   | Mycelium | 72 hpi    |            |
| OG0002229                     | PF003_g27388     | 0                                                                    | 0         | 0        | 0         | 0         | 0        | 0        | 0         | 0          |
| OG0003130                     | PF003_g27387     | 0                                                                    | 0         | 0        | 0         | 0         | 0        | 0        | 0         | 0          |
| <b>Putative <i>PfAvr3</i></b> | <b>OG0018589</b> | <b>PF003_g27386</b>                                                  | <b>17</b> | <b>6</b> | <b>10</b> | <b>12</b> | <b>4</b> | <b>4</b> | <b>16</b> | <b>199</b> |
| OG0018588                     | PF003_g27385     | 38                                                                   | 33        | 26       | 36        | 64        | 78       | 29       | 61        |            |
| OG0018587                     | PF003_g27384     | 0                                                                    | 0         | 0        | 0         | 0         | 0        | 1        | 1         |            |

943 **SUPPORTING TABLES**

944 **SUPPORTING CANDIDATE TABLE | Gene names of all genes identified as putative candidate**  
945 **avirulence genes for *Phytophthora fragariae* UK1, UK2 and UK3.**

946 Gene names are listed with respect to the isolate for which they are described as candidate avirulence  
947 genes.

948

949 **SUPPORTING ANNOTATION TABLE | Details of all predicted genes in *Phytophthora***  
950 ***fragariae* UK2 isolate BC-16.**
